# Supplementary material for: Accommodation of Gly-cisPro in a designed β-hairpin
Source: Royal Society of Chemistry journal article supplement (doi:10.1039/d1cc02640b), 2021-01-01
Supplement: d1cc02640b1.pdf [file d1cc02640b1.pdf]

## Supporting information

### Accommodation of Gly-*cis*Pro in a designed $\beta$ -hairpin

Chandradeep Basu,<sup>†</sup> Himal Kanti Ganguly<sup>†</sup> and Gautam Basu<sup>\*</sup>

Department of Biophysics, Bose Institute, P-1/12 CIT Scheme VII M , Kolkata 700054, India.

<sup>†</sup> Authors contributed equally.

<sup>\*</sup> To whom all correspondences should be addressed

## Section S1. Materials and Methods

### Peptide synthesis:

All peptides were synthesized by using the standard solid-phase peptide synthesis procedure in a stepwise manner on an AAPPTEC 90II peptide synthesizer, using Fmoc chemistry. Rink amide MBHA resin (0.39 mmol/g substitution) and Fmoc-amino acids were purchased from Novabiochem while the fluorinated amino acids, Fmoc-4-*R*-fluoroproline (<sup>t</sup>P) and Fmoc-4-*S*-fluoroproline (<sup>c</sup>P), were purchased from BACHEM. The Fmoc-protected amino acid derivatives (5-fold excess of resin load) were coupled using PyBOP and diisopropylethylamine (DIPEA) (5- and 10-fold excess of resin substitution, respectively) in *N,N*-dimethylformamide (DMF). The deprotection reactions of the Fmoc group were achieved using 20% (v/v) piperidine solution in DMF. The peptides were acetylated at their N-terminal by using acetic acid, PyBOP, and DIPEA (5-, 5-, 10-fold excess of resin substitution, respectively) in DMF. The peptides were cleaved from the resin using a cleavage cocktail containing 85% TFA, 5% water, 5% phenol, 2.5% anisole and 2.5% triisopropylsilane for 1 h. TFA was removed by evaporation, and the afforded crude peptides were dissolved in methanol. Peptides were purified using reverse-phase HPLC (on Phenomenix C18 column) using a linear gradient (0 to 100% over 60 min) of H<sub>2</sub>O/CH<sub>3</sub>OH). The purified peptides were then lyophilized and then characterized by MALDI-TOF mass spectrometry and <sup>1</sup>H NMR spectroscopy.

### CD Spectrophotometry:

Circular dichroism experiments for the peptides were carried out in methanol at two different temperatures, 298 K and 278 K respectively, on a JASCO J-1500 CD spectrophotometer. Concentrations of the peptides were maintained around 50 μM. All spectra were recorded from 260 nm to 200 nm with data interval of 1 nm. Scan speed was set to 50 nm/min and digital integration time (D.I.T) was set to 4 sec. All spectra were averaged over 3 scans. The spectra were baseline corrected manually and the ellipticity value at 260 nm for all the spectra were zero-corrected. For each peptide at least 3 independent trials were performed and the averaged data were used for analysis.

## NMR Spectroscopy:

All  $^1\text{H}$  NMR experiments were carried out either on a Bruker Avance III 500 MHz spectrometer equipped with a SMART probe or on a Bruker Avance III 700 MHz spectrometer equipped with an RT probe at 298 K, unless otherwise mentioned. Spectra of the peptides were obtained in  $\text{CD}_3\text{OH}$ . Resonance assignments for the amino acids within the peptides were achieved via TOCSY with 80 ms spinlock time with 2048 data points and 510 t1 increments. The sequence assignments were achieved via ROESY experiments (mixing time of 250-350 ms, 510 t1 increments, and 16 scans per t1 increment). The prolyl isomers were identified using the expected  $\text{H}\alpha\text{-H}\alpha$  and  $\text{H}\alpha\text{-H}\delta$  ROE cross-peaks for the *cis* and the *trans* isomers, respectively. Relative *cis-trans* populations were calculated from the relative integrals of appropriate well-resolved resonances (amide) from the corresponding  $^1\text{H}$  NMR spectra.

### Characterization of peptides by $^1\text{H}$ NMR spectroscopy

8W-L : [LLV<sup>D</sup>PGYWV]

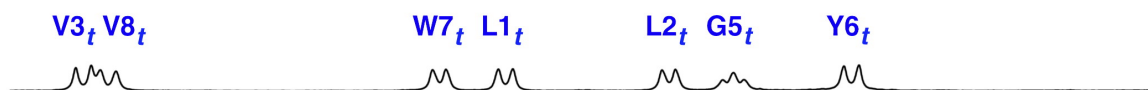

8W-P : [LPV<sup>D</sup>PGYWV]

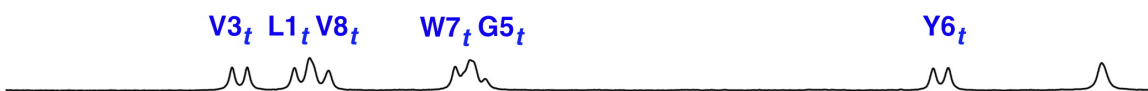

8W-G : [LGV<sup>D</sup>PGYWV]

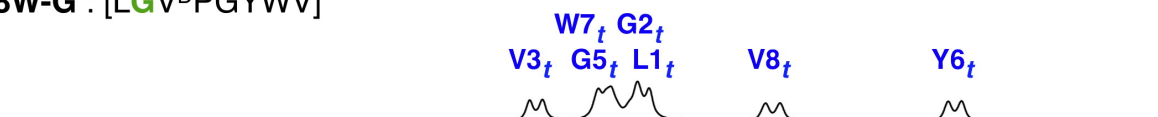

8W-PG : [LPGV<sup>D</sup>PGYWV]

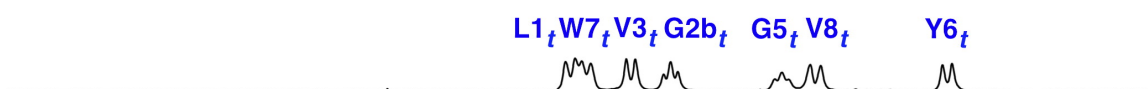

8W-GP : [LGPV<sup>D</sup>PGYWV]

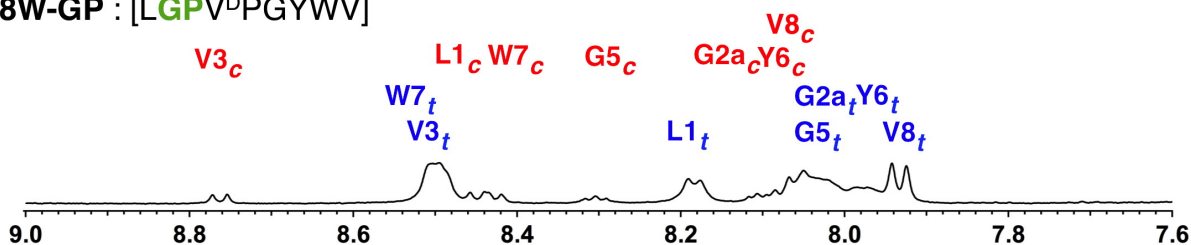

**Figure S1:** Comparison of the amide region in the  $^1\text{H}$  NMR for the peptides 8W-L, 8W-P, 8W-G, 8W-PG, and 8W-GP in  $\text{CD}_3\text{OH}$  at 298 K.

8W-P : [LPV<sup>D</sup>PGYWV]

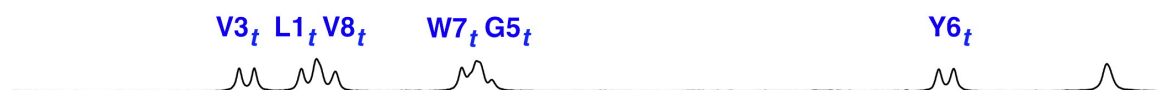

8W-<sup>1</sup>P : [L<sup>1</sup>PV<sup>D</sup>PGYWV]

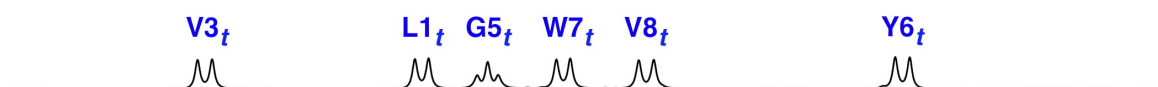

8W-<sup>c</sup>P : [L<sup>c</sup>PV<sup>D</sup>PGYWV]

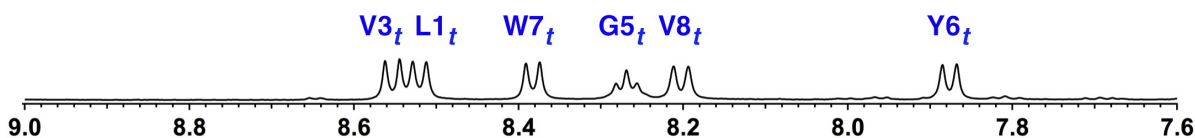

**Figure S2:** Comparison of the amide region in the  $^1\text{H}$  NMR for the peptides 8W-P, 8W-<sup>1</sup>P, and 8W-<sup>c</sup>P in  $\text{CD}_3\text{OH}$  at 298 K.

8W-GP : [LGPV<sup>D</sup>PGYWV]

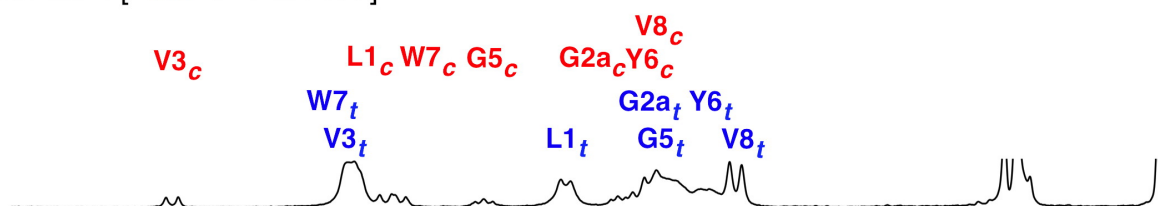

8W-G<sup>t</sup>P : [LG<sup>t</sup>PV<sup>D</sup>PGYWV]

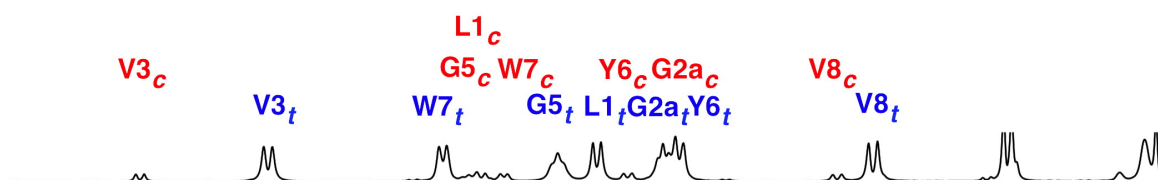

8W-G<sup>c</sup>P : [LG<sup>c</sup>PV<sup>D</sup>PGYWV]

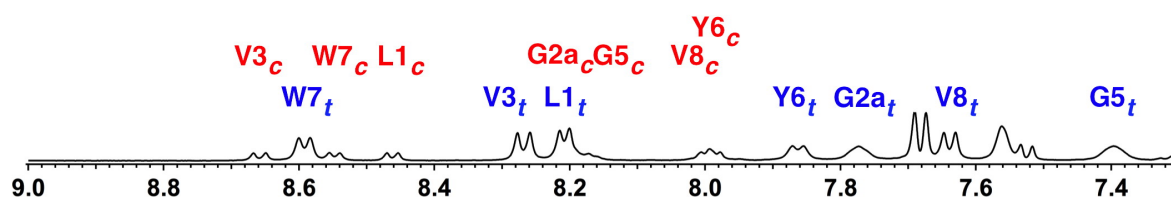

**Figure S3:** Comparison of the amide region in the <sup>1</sup>H NMR for the peptides 8W-GP, 8W-G<sup>t</sup>P, and 8W-G<sup>c</sup>P in CD<sub>3</sub>OH at 298 K.

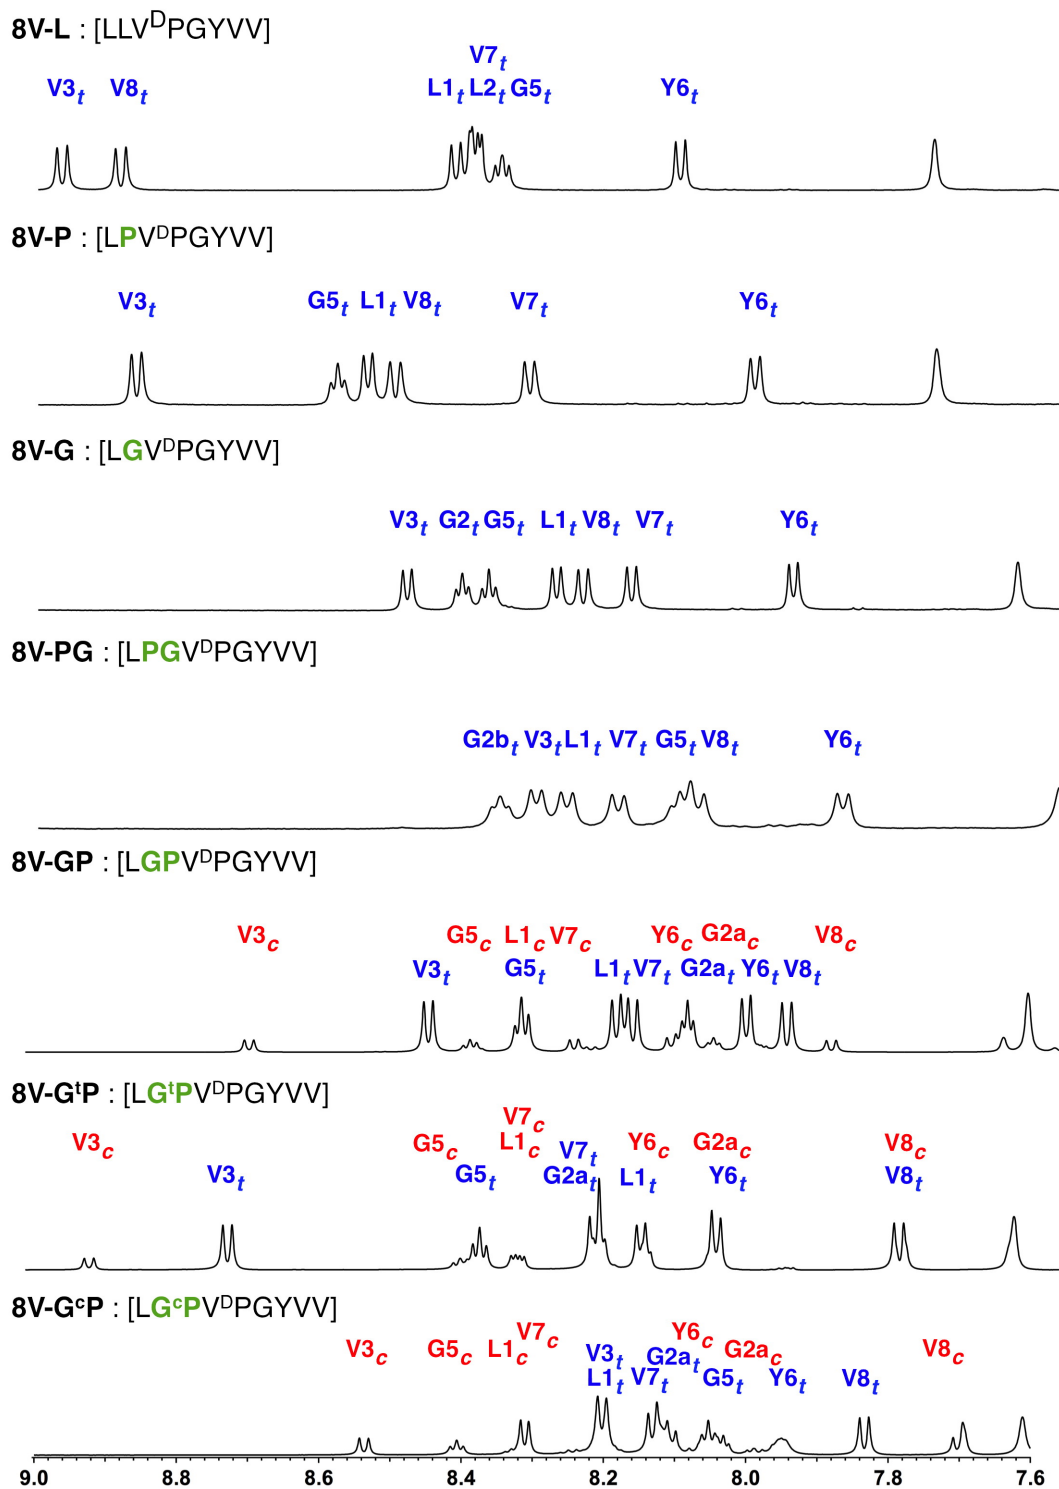

**Figure S4:** Comparison of the amide region in the <sup>1</sup>H NMR for the peptides in 8V series in CD<sub>3</sub>OH at 298 K.

Assigned TOCSY spectra for all peptides

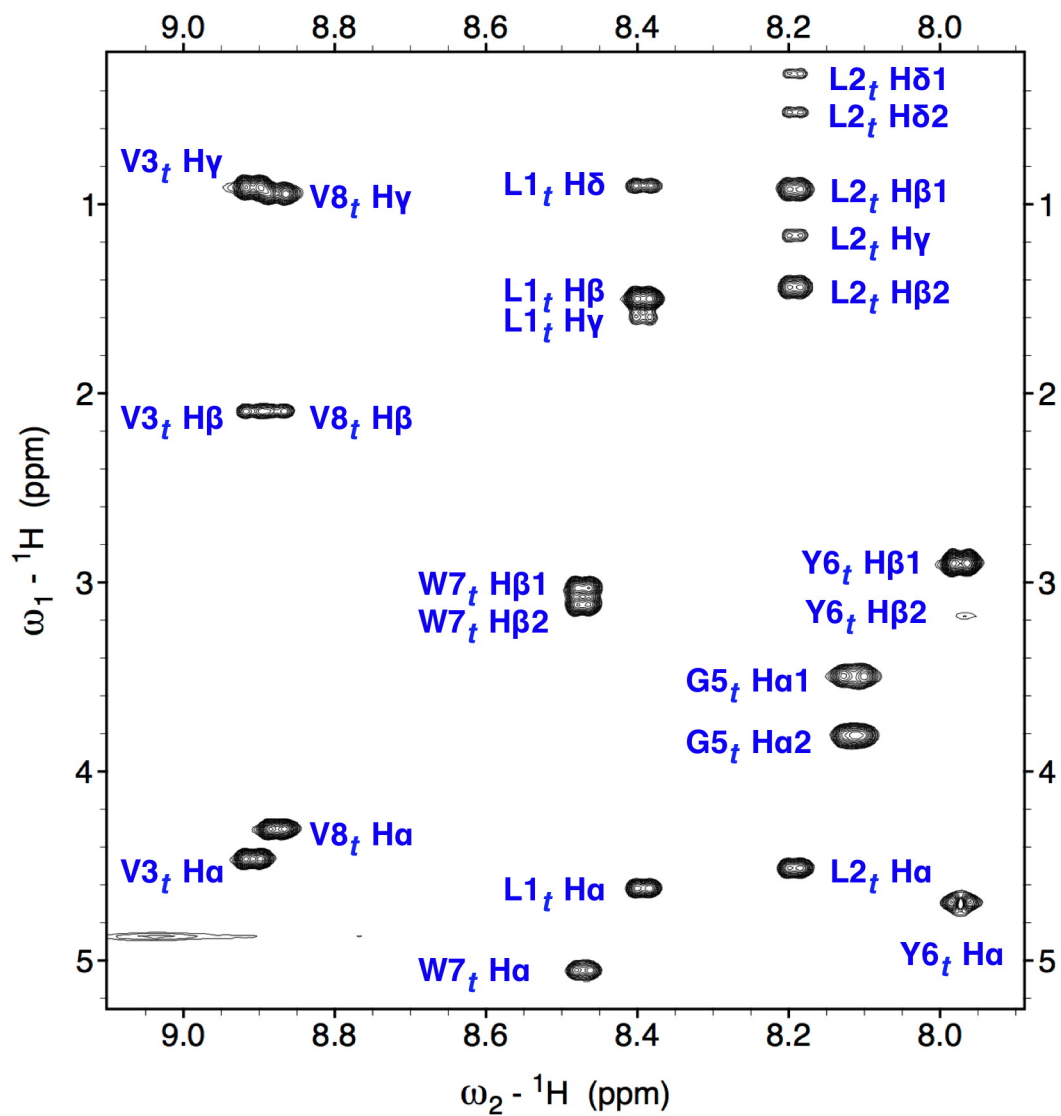

Figure S5: Amide fingerprint region from TOCSY of the peptide 8W-L in CD<sub>3</sub>OH at 298 K.

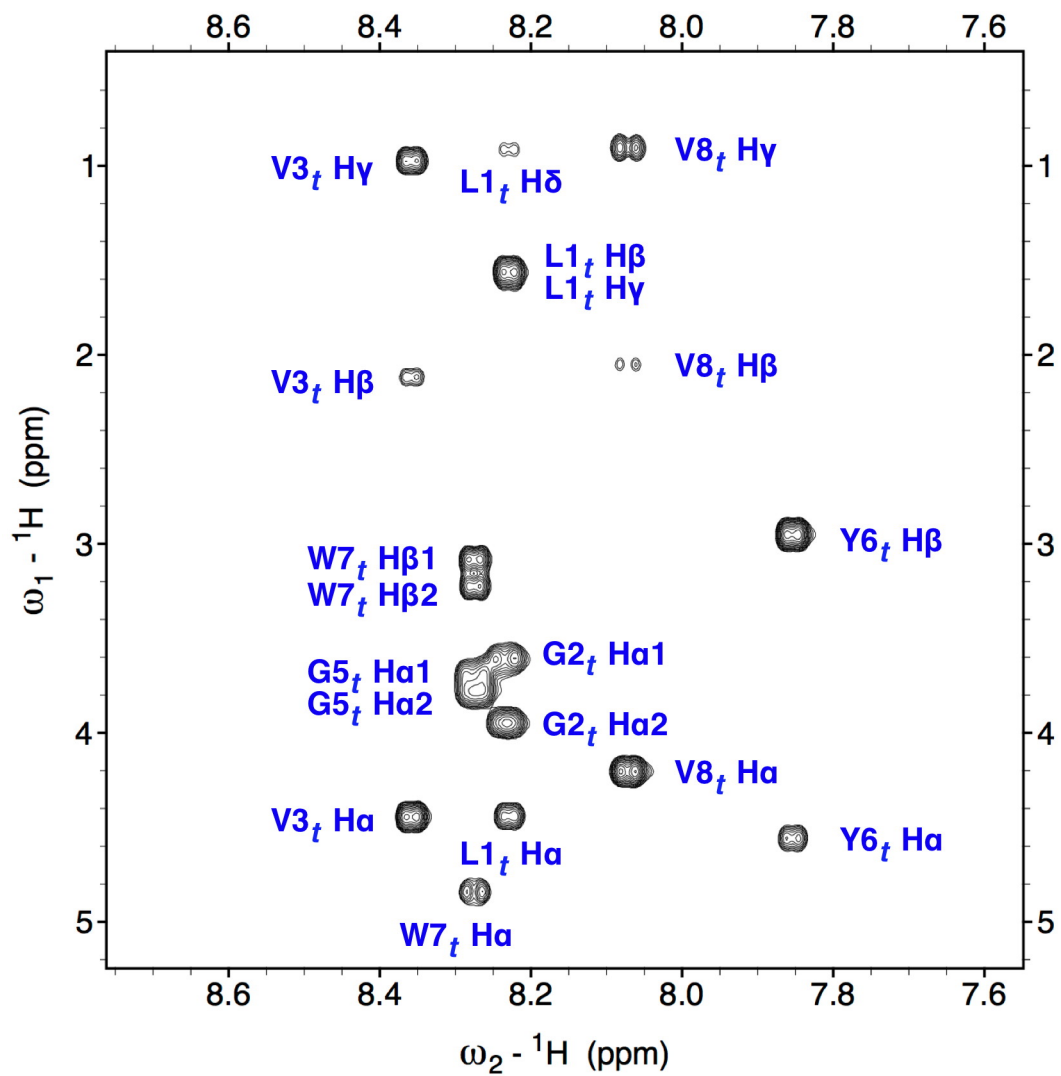

**Figure S6:** Amide fingerprint region from TOCSY of the peptide 8W-G in CD<sub>3</sub>OH at 298 K.



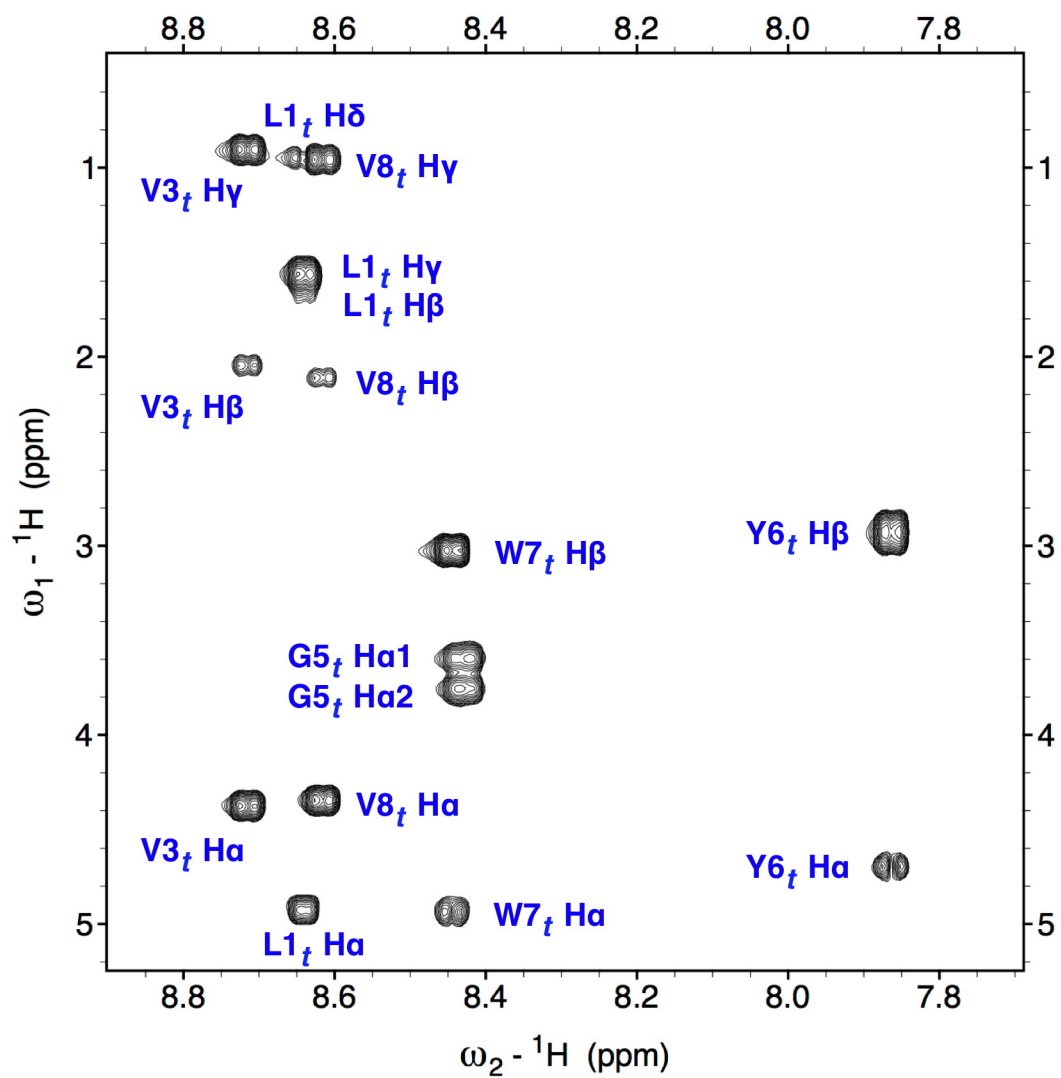

**Figure S7:** Amide fingerprint region from TOCSY of the peptide 8W-P in CD<sub>3</sub>OH at 298 K.

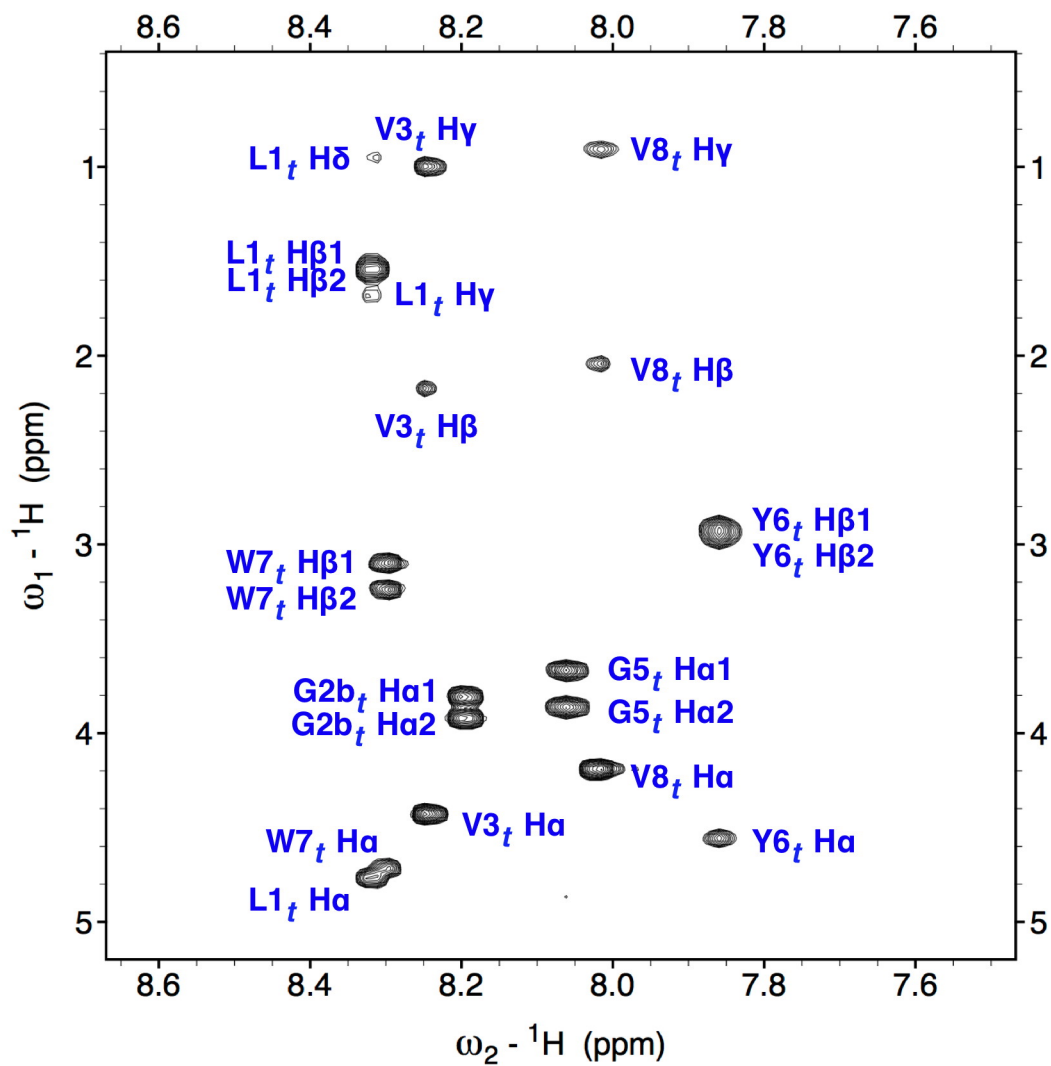

**Figure S8:** Amide fingerprint region from TOCSY of the peptide 8W-PG in CD<sub>3</sub>OH at 298 K. Numbering the proline and glycine as residues with numbers as 2a and 2b, respectively, reflects the replacement of L2 with PG.

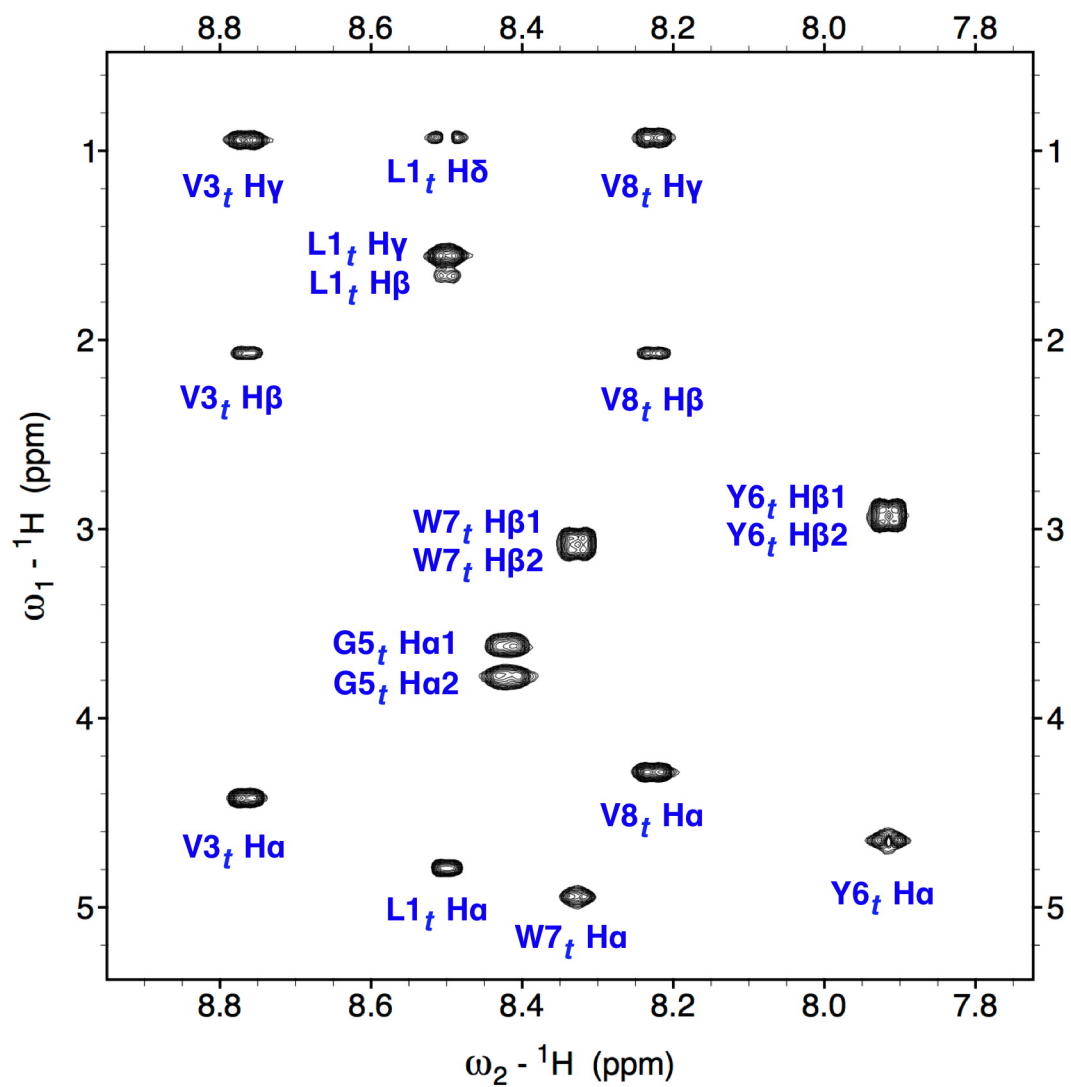

**Figure S9:** Amide fingerprint region from TOCSY of the peptide 8W-<sup>1</sup>P in CD<sub>3</sub>OH at 298 K.

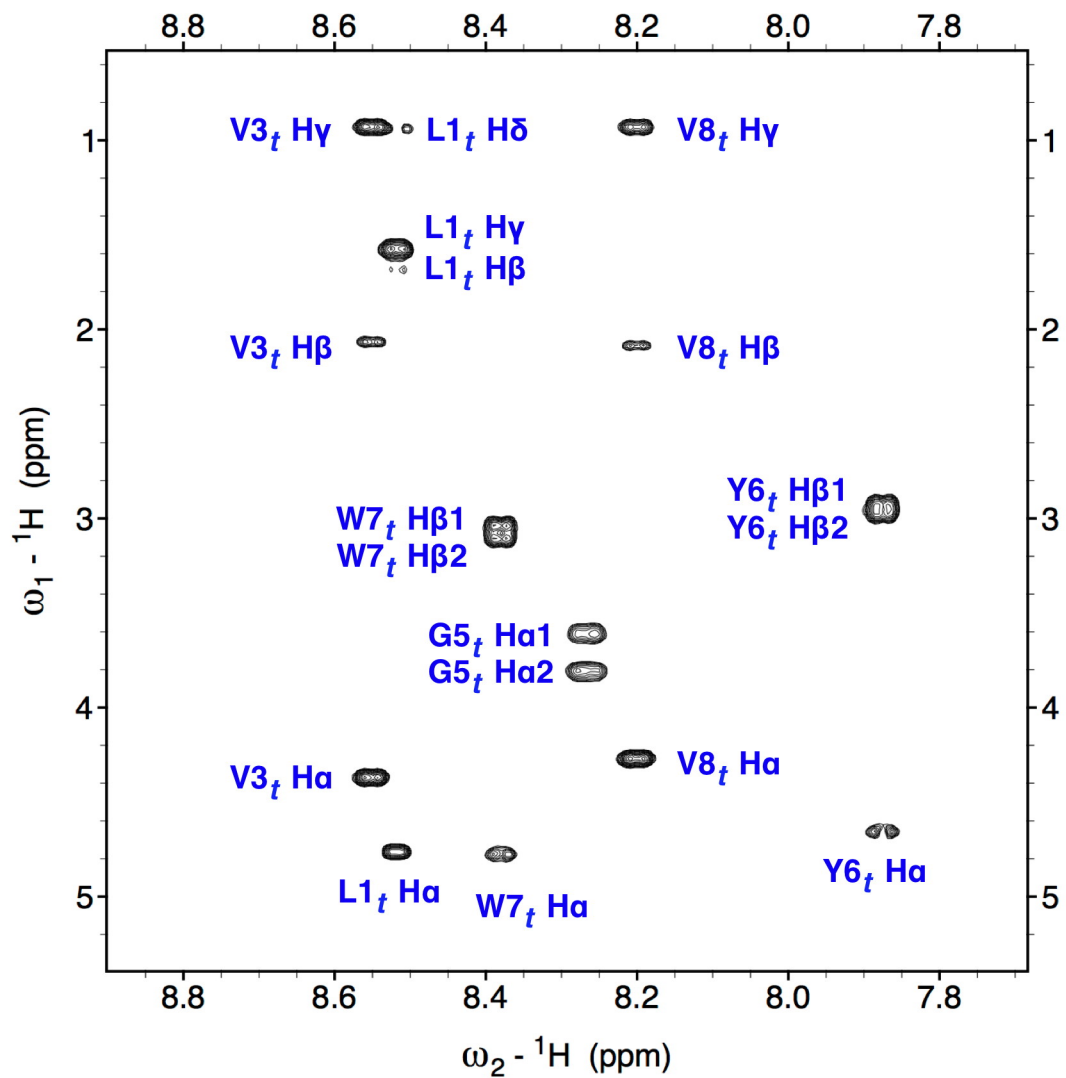

**Figure S10:** Amide fingerprint region from TOCSY of the peptide 8W-cP in CD<sub>3</sub>OH at 298 K.

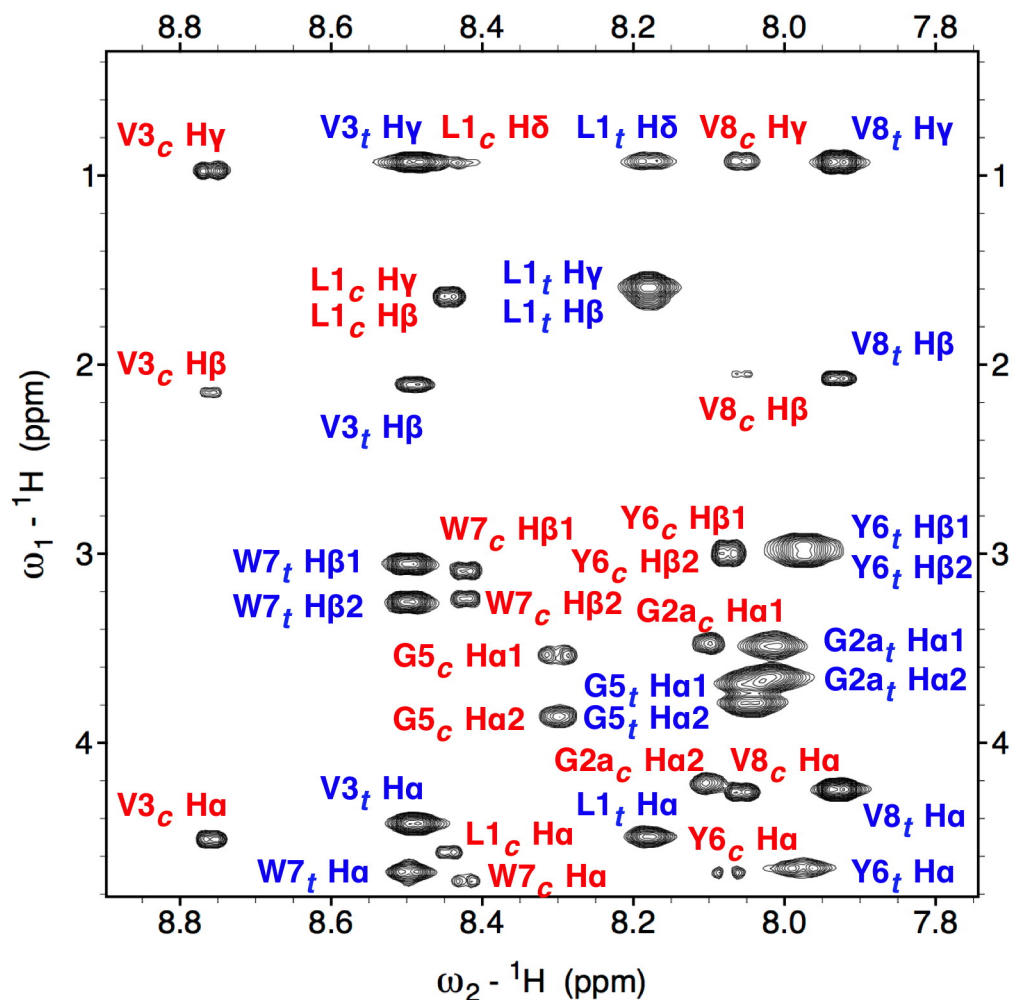

**Figure S11:** Amide fingerprint region from TOCSY of the peptide 8W-GP in CD<sub>3</sub>OH at 298 K. Numbering the glycine and proline as residues with numbers as 2a and 2b, respectively, reflects the replacement of L2 with GP. The resonances corresponding to the *cis* and the *trans* isomers are labeled in red and blue, respectively.

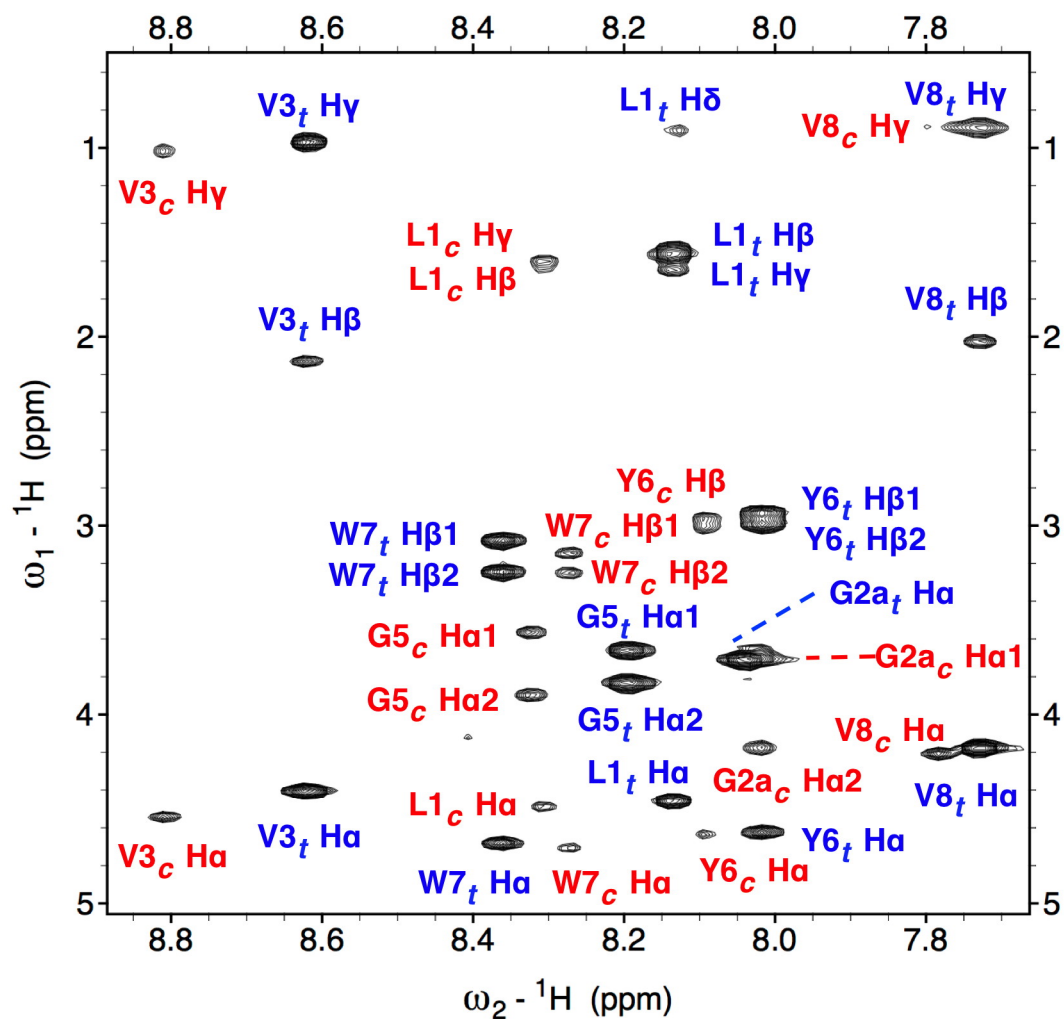

**Figure S12:** Amide fingerprint region from TOCSY of the peptide 8W-G<sup>t</sup>P in CD<sub>3</sub>OH at 298 K. Numbering the glycine and 4*R*-fluoroproline (<sup>t</sup>P) as residues with numbers as 2a and 2b, respectively, reflects the replacement of L2 with G<sup>t</sup>P. The resonances corresponding to the *cis* and the *trans* isomers are labeled in red and blue, respectively.

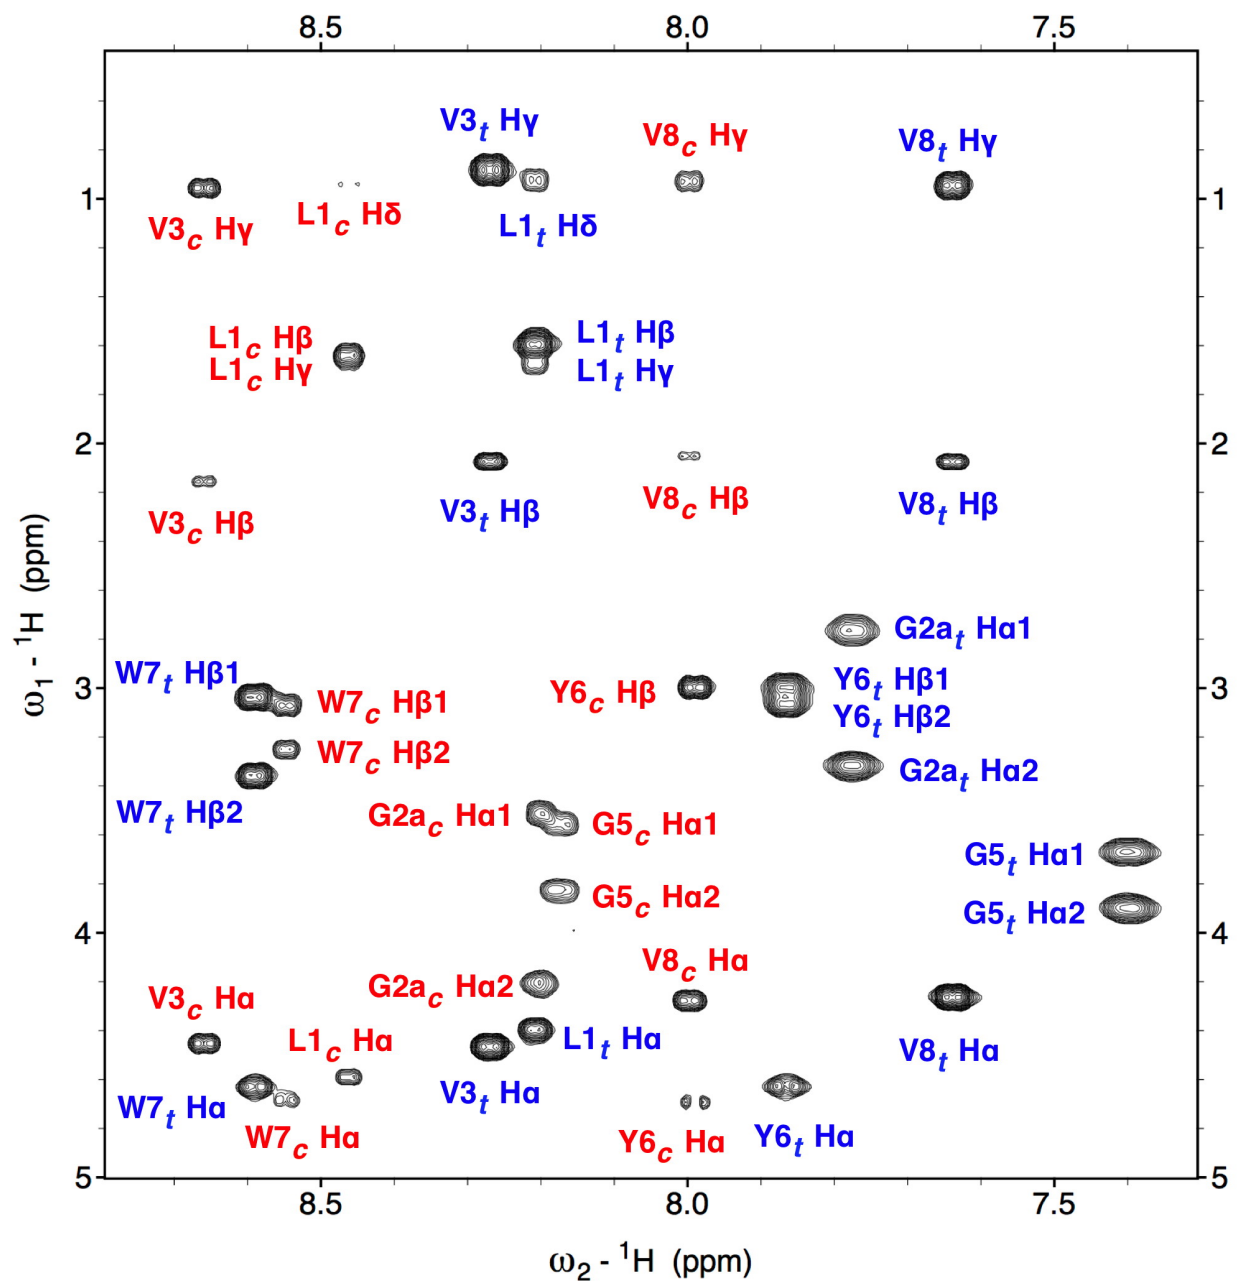

**Figure S13:** Amide fingerprint region from TOCSY of the peptide 8W-G<sup>c</sup>P in CD<sub>3</sub>OH at 298 K. Numbering the glycine and 4*S*-fluoroproline (<sup>c</sup>P) as residues with numbers as 2a and 2b, respectively, reflects the replacement of L2 with G<sup>c</sup>P. The resonances corresponding to the *cis* and the *trans* isomers are labeled in red and blue, respectively.

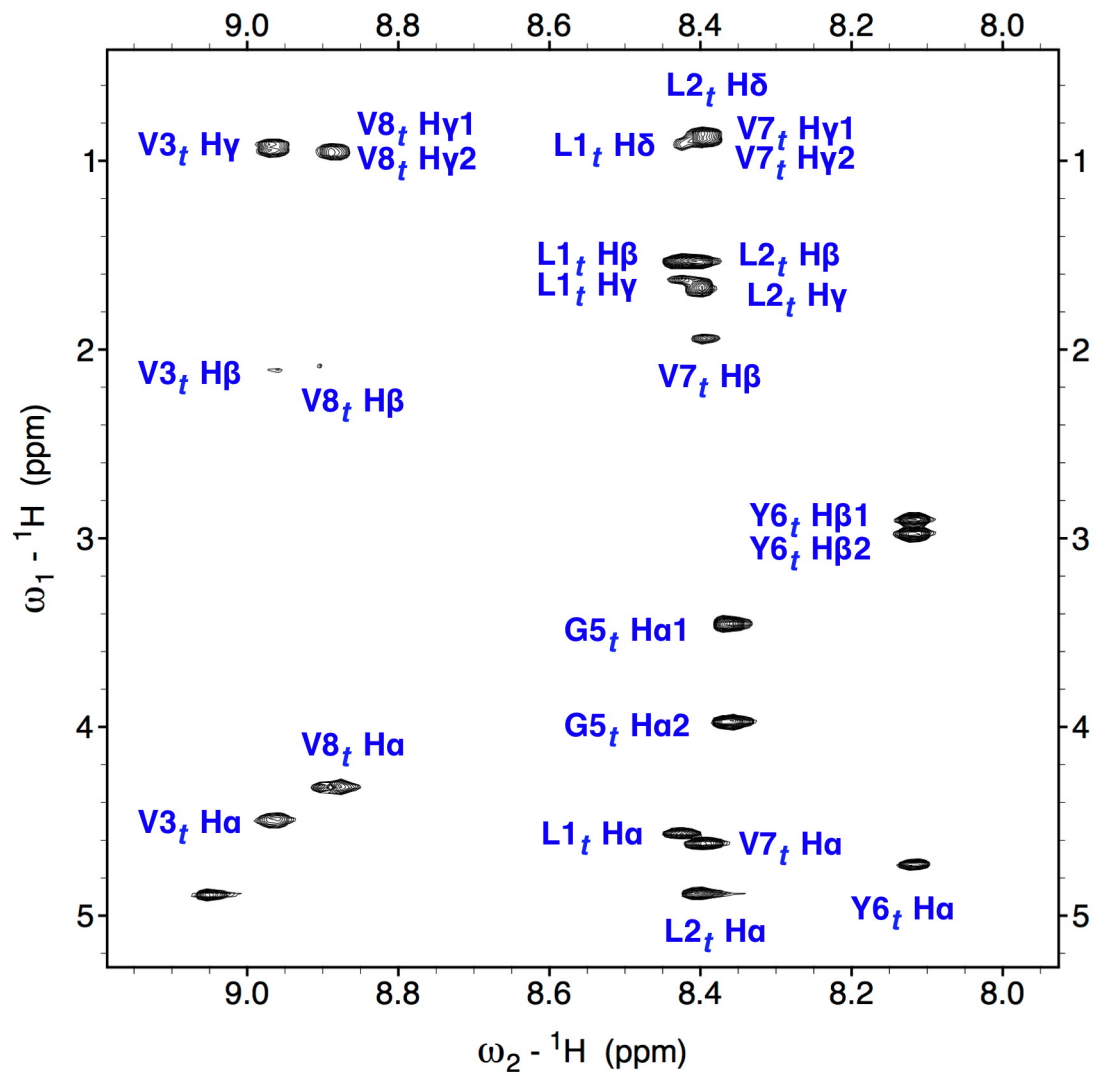

**Figure S14:** Amide fingerprint region from TOCSY of the peptide 8V-L in CD<sub>3</sub>OH at 298 K.



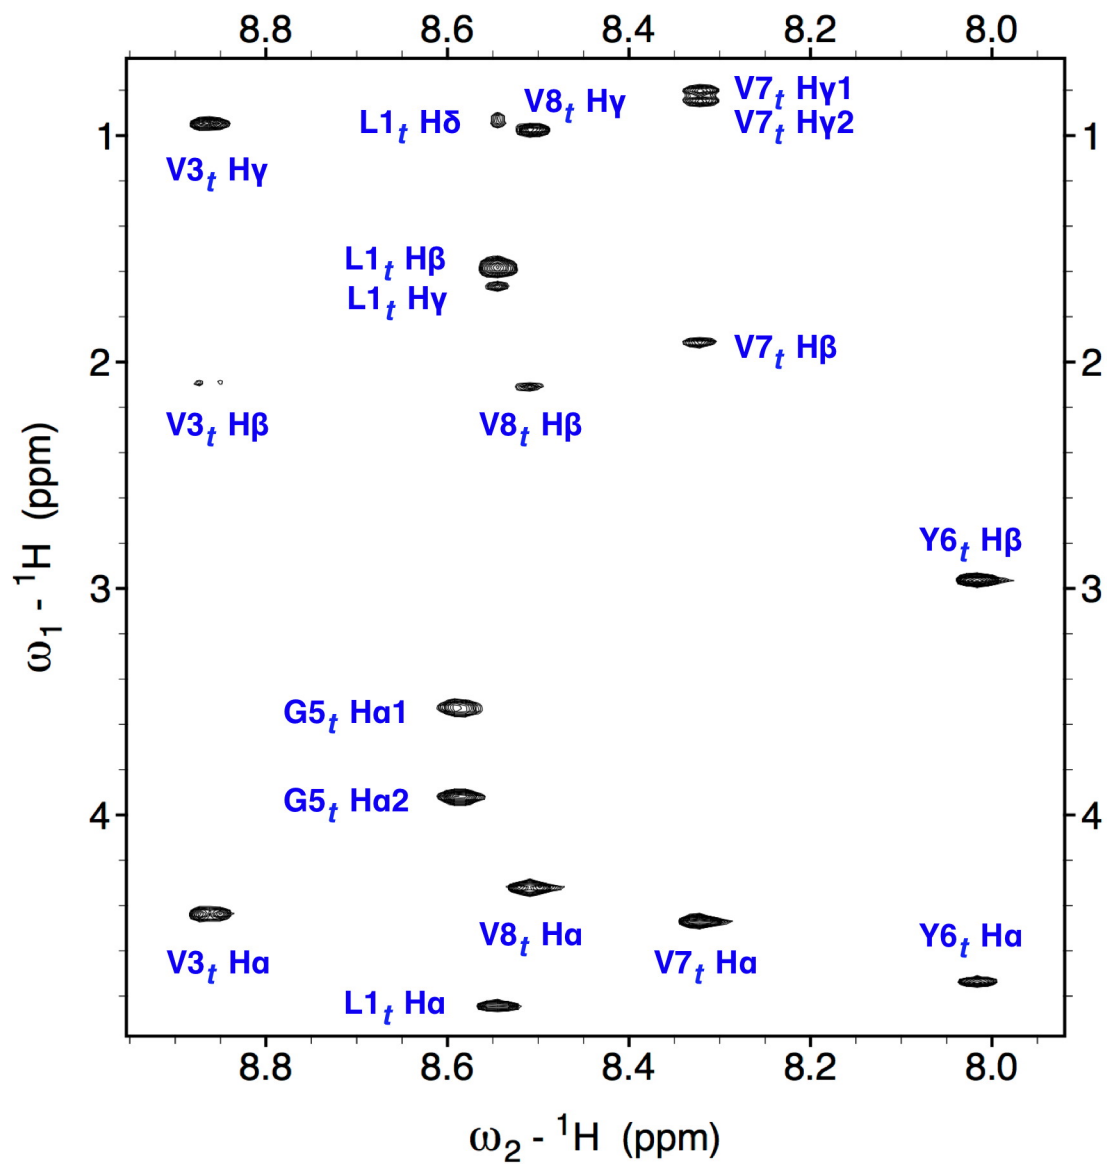

**Figure S15:** Amide fingerprint region from TOCSY of the peptide 8V-P in CD<sub>3</sub>OH at 298 K.

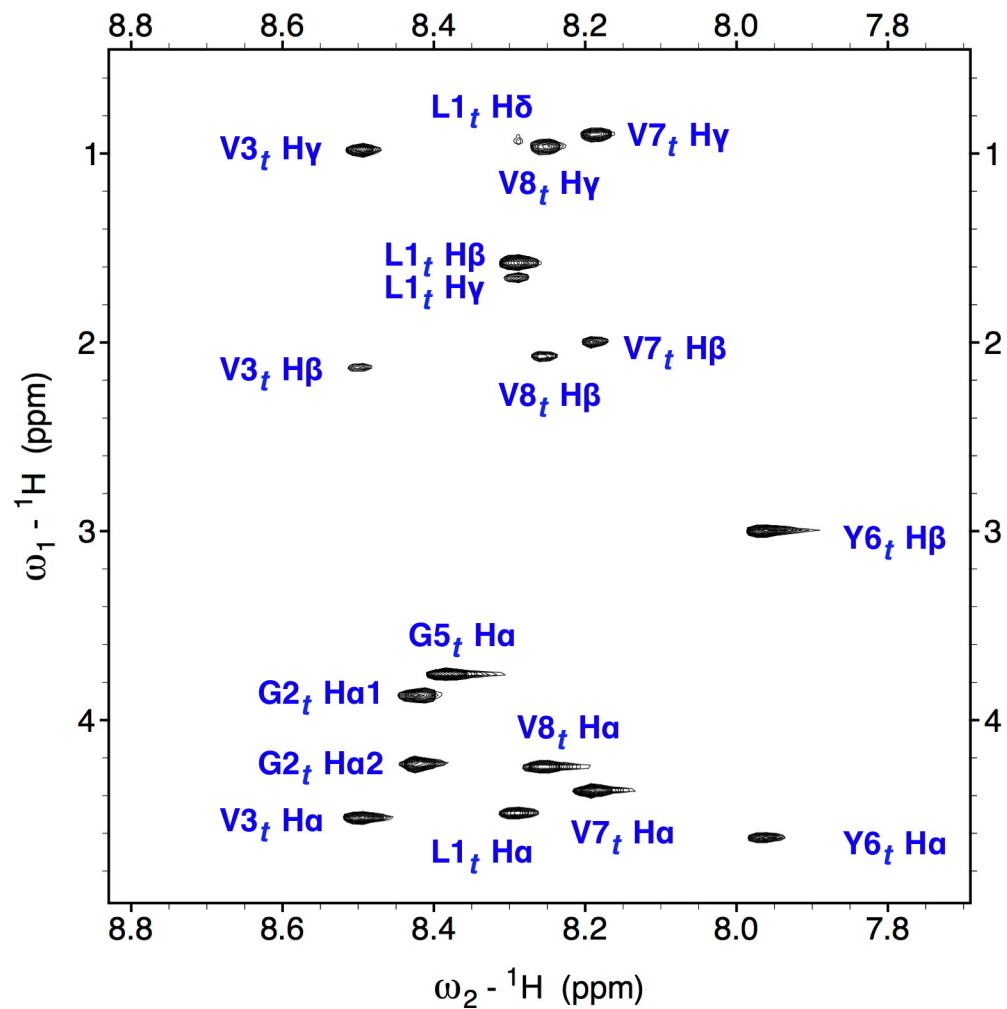

**Figure S16:** Amide fingerprint region from TOCSY of the peptide 8V-G in CD<sub>3</sub>OH at 298 K.

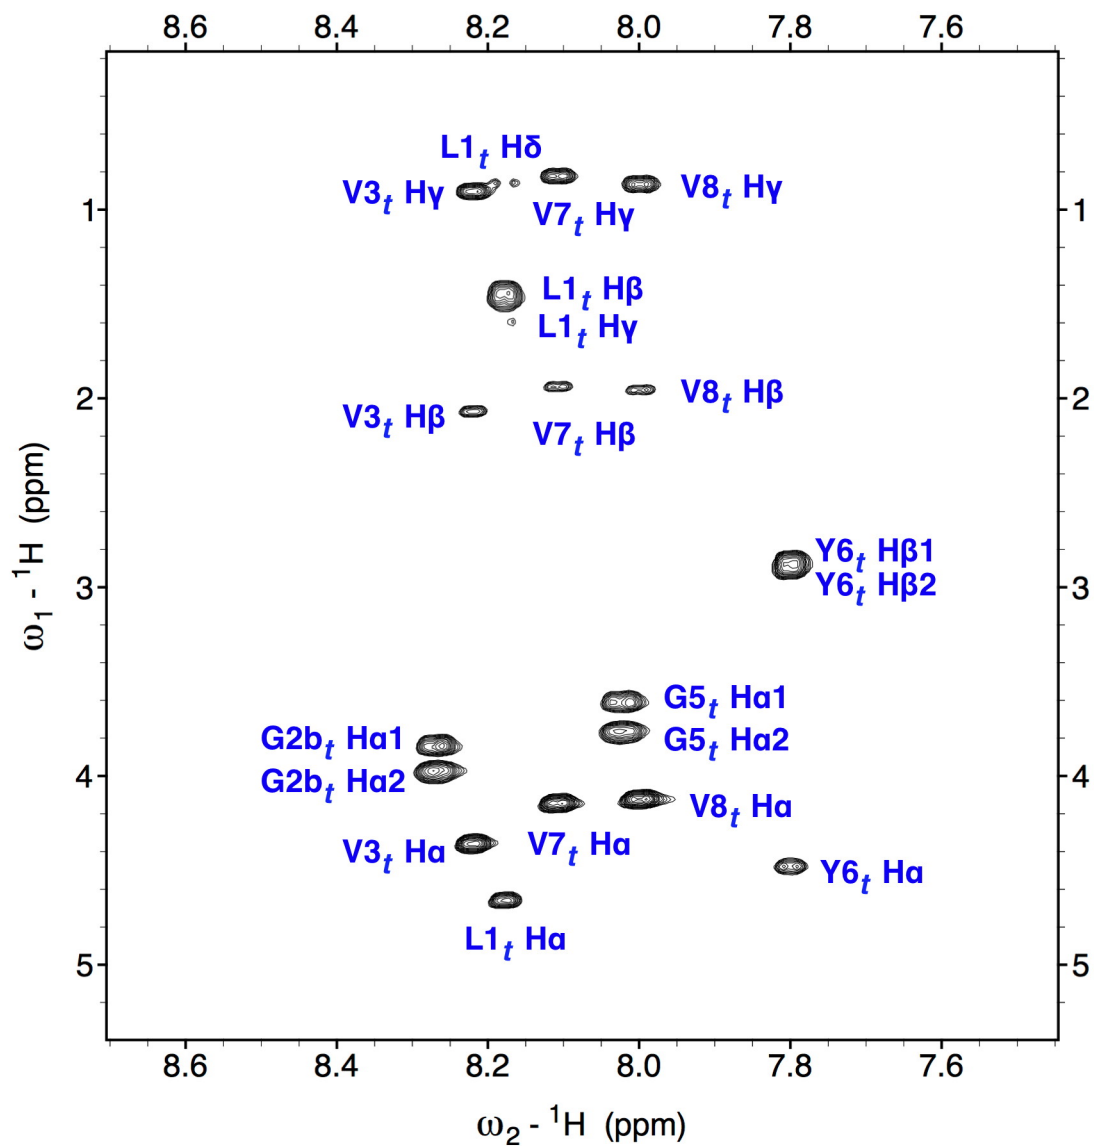

**Figure S17:** Amide fingerprint region from TOCSY of the peptide 8V-PG in CD<sub>3</sub>OH at 298 K. Numbering the proline and glycine as residues with numbers as 2a and 2b, respectively, reflects the replacement of L2 with PG.

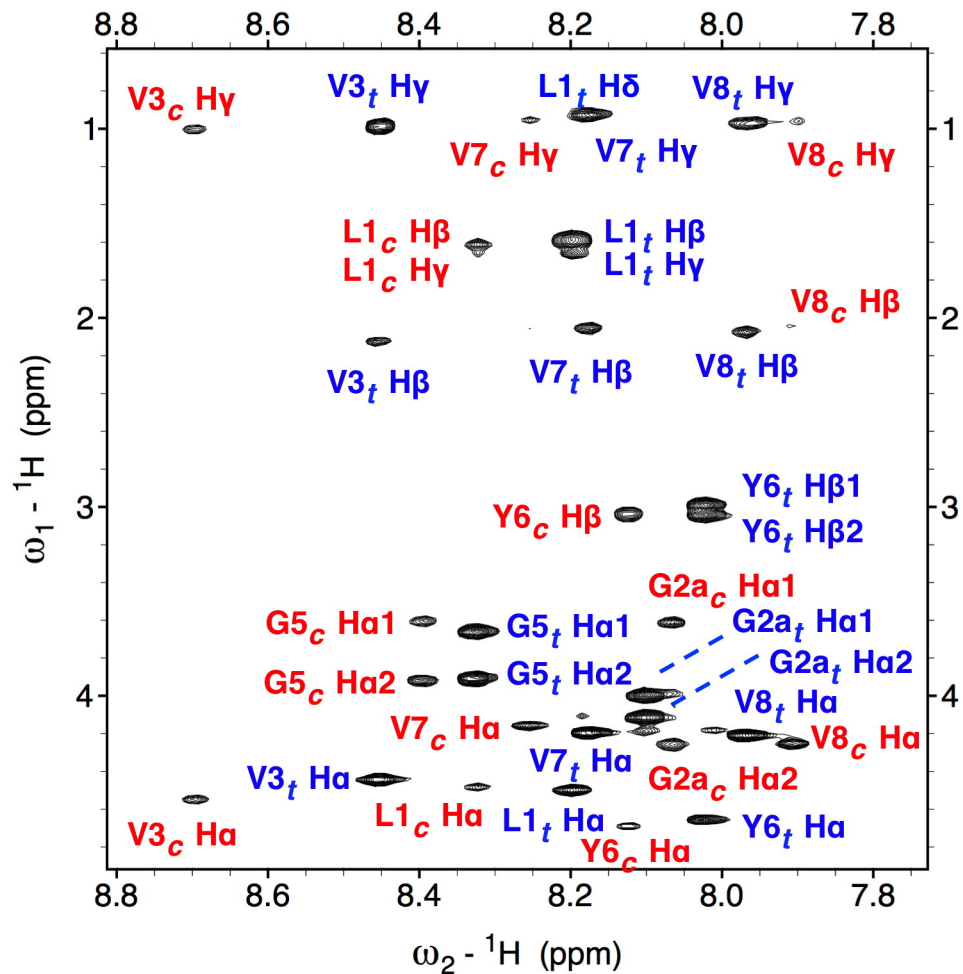

**Figure S18:** Amide fingerprint region from TOCSY of the peptide 8V-GP in CD<sub>3</sub>OH at 298 K. Numbering the glycine and proline as residues with numbers as 2a and 2b, respectively, reflects the replacement of L2 with GP. The resonances corresponding to the *cis* and the *trans* isomers are labeled in red and blue, respectively.

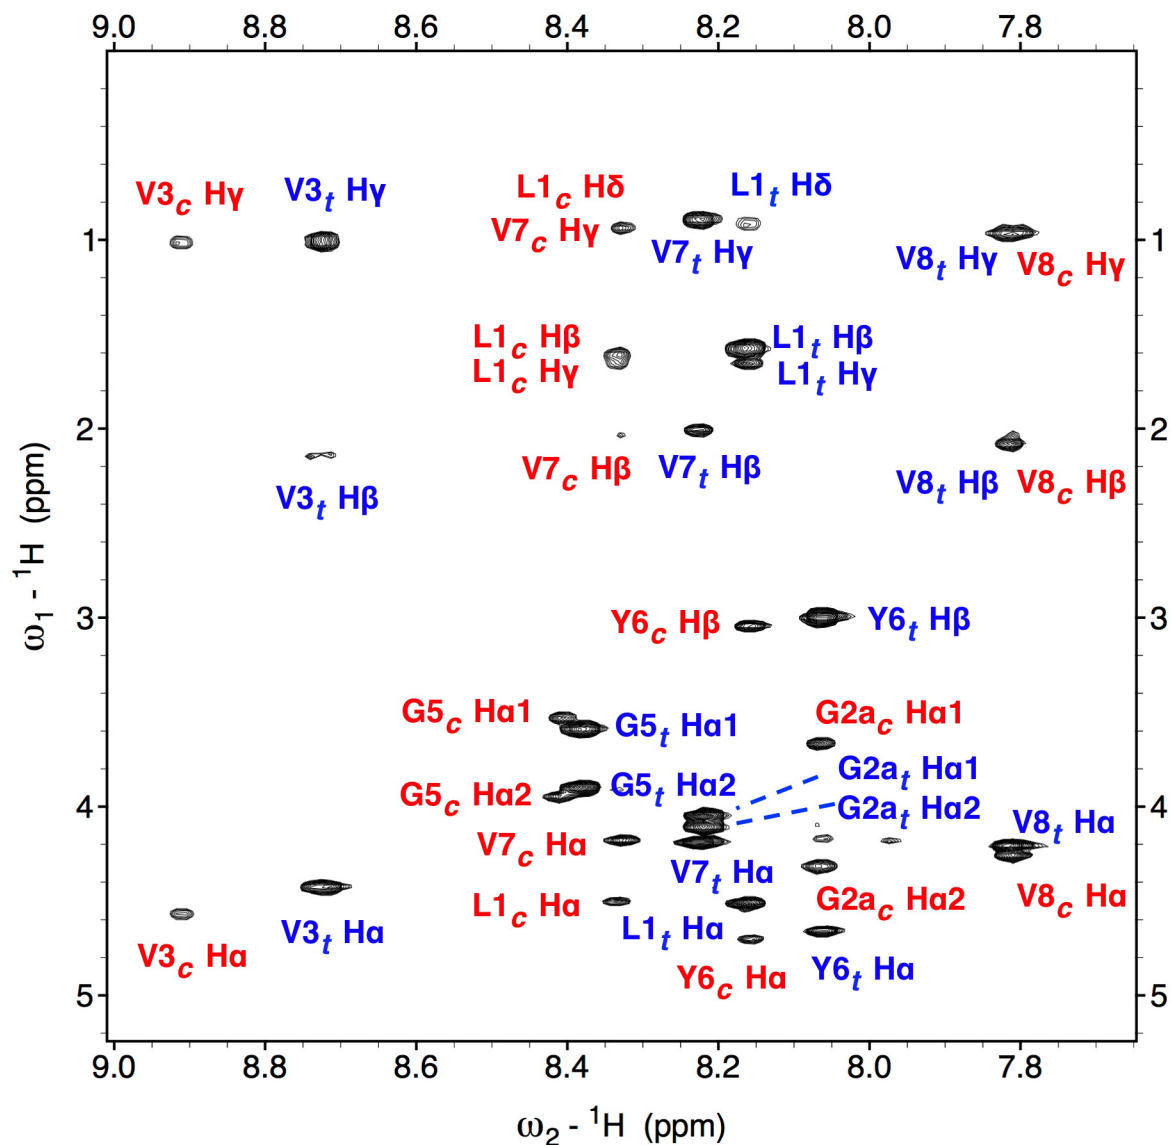

**Figure S19:** Amide fingerprint region from TOCSY of the peptide 8V-G<sup>1</sup>P in CD<sub>3</sub>OH at 298 K. Numbering the glycine and 4*R*-fluoroproline (<sup>1</sup>P) as residues with numbers as 2a and 2b, respectively, reflects the replacement of L2 with G<sup>1</sup>P. The resonances corresponding to the *cis* and the *trans* isomers are labeled in red and blue, respectively.

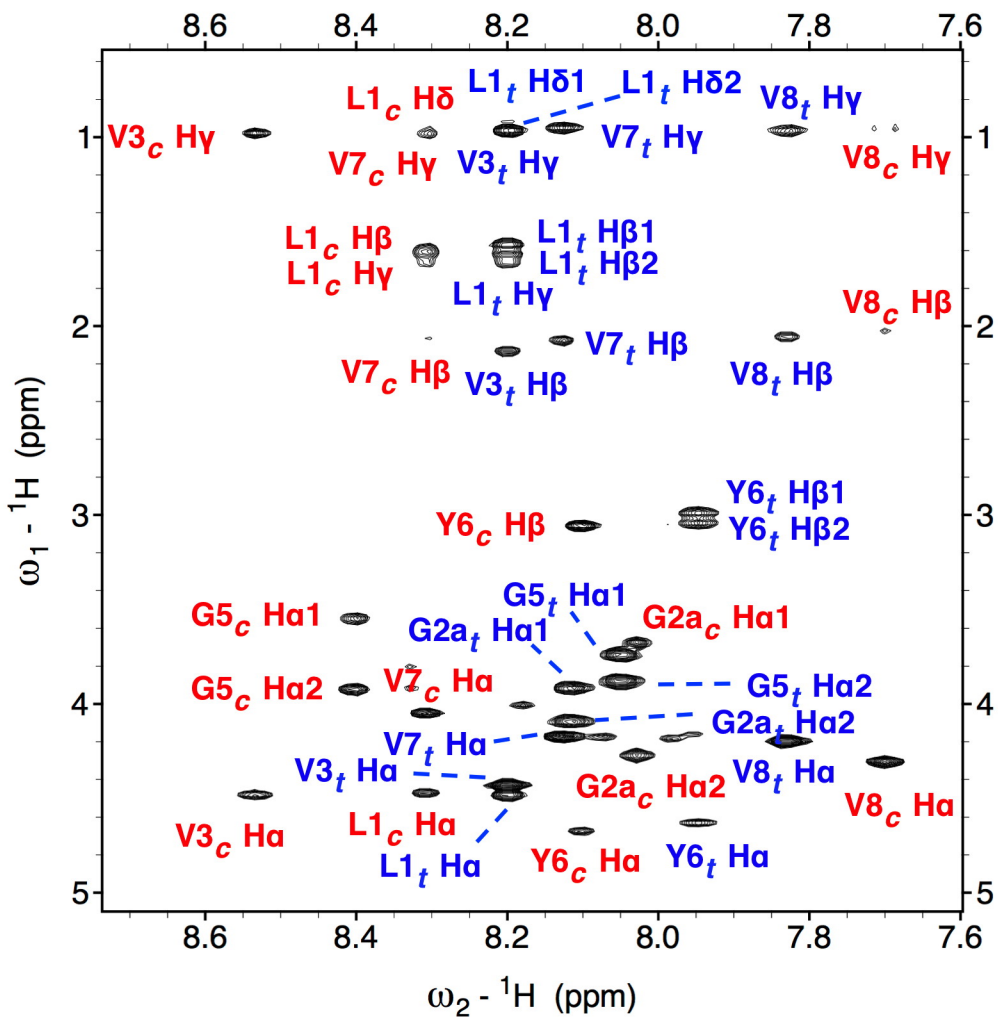

**Figure S20:** Amide fingerprint region from TOCSY of the peptide 8V-G<sup>c</sup>P in CD<sub>3</sub>OH at 298 K. Numbering the glycine and 4*S*-fluoroproline (<sup>c</sup>P) as residues with numbers as 2a and 2b, respectively, reflects the replacement of L2 with G<sup>c</sup>P. The resonances corresponding to the *cis* and the *trans* isomers are labeled in red and blue, respectively.

**Key ROESY spectra from the peptides in the 8W series**

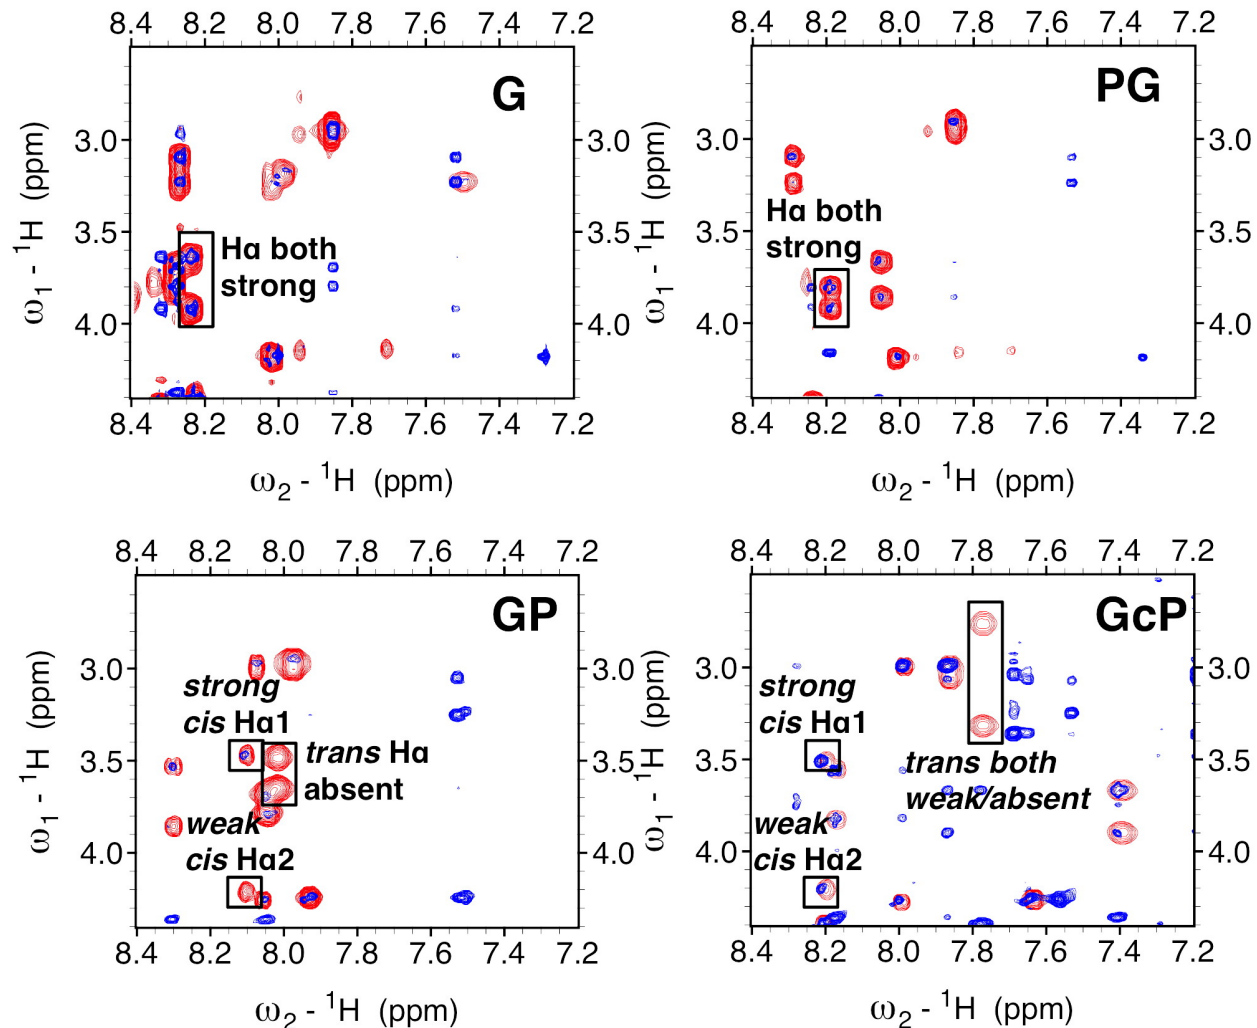

**Figure S21:** Superimposed TOCSY (red) and ROESY (blue) of 8W-G, 8W-PG, 8W-GP, and 8W-G<sup>c</sup>P. The relative intensities of the HN-Ha crosspeaks corresponding to the Gly residue occupying either the 2<sup>nd</sup> or the 2a or the 2b (whichever is applicable) are boxed.

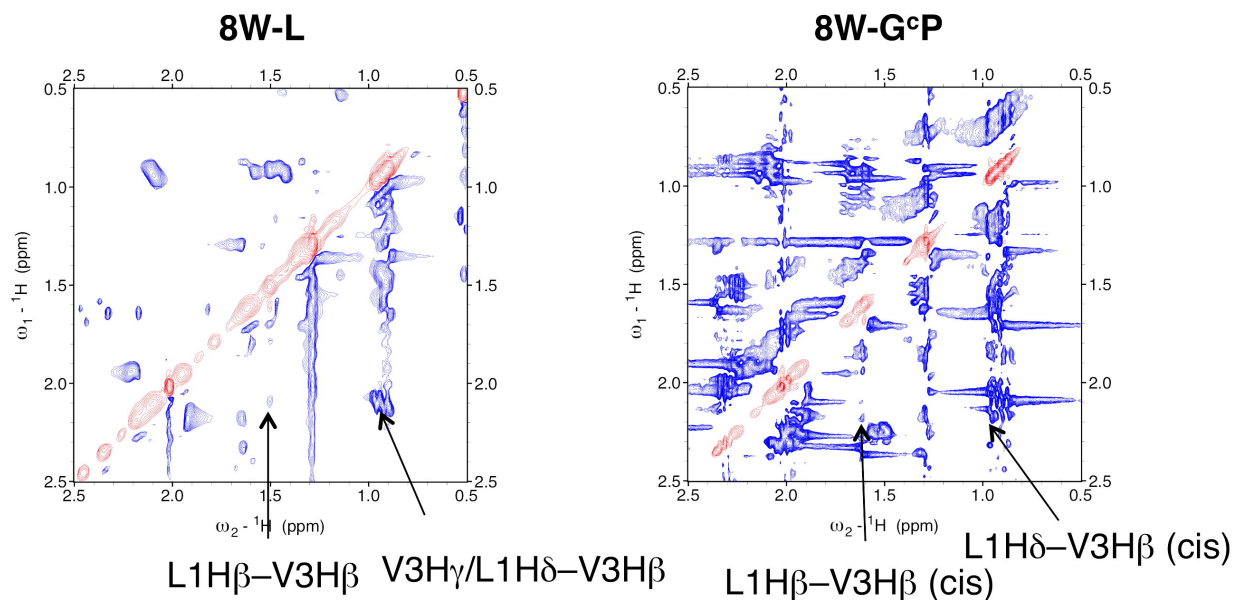

**Figure S22:** ROESY of 8W-L and 8W-G<sup>c</sup>P. The red contours represent the diagonal, and negative cross peaks are shown in blue. The key side-chain-side-chain ROE cross peaks are shown with arrows. In 8W-L the Leu1 and Val3 side chains exhibit ROE cross peaks (*i*→*i*+2) while in 8W-G<sup>c</sup>P the Leu1 and Val3 side chains, that are separated by the united residue Gly-cisPro, exhibit (*i*→*i*+3) ROE cross peaks.



## Characterization of peptides by mass spectroscopy

**Table S1:** The m/z expected and observed for all peptides.

| Peptides             | $m_{\text{expected}}$ (Da) | $m/z_{\text{observed}}$ (Da) |                  |
|----------------------|----------------------------|------------------------------|------------------|
|                      |                            | M+Na <sup>+</sup>            | M+K <sup>+</sup> |
| 8W-L                 | 987.19                     | 1009.59                      | 1025.57          |
| 8W-G                 | 931.09                     | 953.53                       | 969.50           |
| 8W-P                 | 971.15                     | 993.55                       | 1009.50          |
| 8W- <sup>t</sup> P   | 989.15                     | 1011.50                      | 1027.50          |
| 8W- <sup>c</sup> P   | 989.15                     | 1011.60                      | 1027.60          |
| 8W-PG                | 1028.20                    | 1050.60                      | 1066.60          |
| 8W-GP                | 1028.20                    | 1050.60                      | 1066.50          |
| 8W-G <sup>t</sup> P  | 1046.20                    | 1068.60                      | 1084.50          |
| 8W-G <sup>c</sup> P  | 1046.20                    | 1068.60                      | 1084.50          |
| 8V-L                 | 900.11                     | 922.52                       | 938.49           |
| 8V-G                 | 844.01                     | 866.41                       | 882.39           |
| 8V-P                 | 884.07                     | 906.44                       | 922.42           |
| 8V-PG                | 941.12                     | 963.54                       | 979.52           |
| 8V- GP               | 941.12                     | 963.50                       | 979.48           |
| 8V- G <sup>t</sup> P | 959.12                     | 981.50                       | 997.42           |
| 8V- G <sup>c</sup> P | 959.12                     | 981.45                       | 997.42           |

**Table S2:** Resonance assignment of 8W-L in CD<sub>3</sub>OH at 298 K

| Residue           | X-P amide    | H <sup>N</sup> | H $\alpha$ | H $\beta$  | H $\gamma$ | Others                                                                                                                        |
|-------------------|--------------|----------------|------------|------------|------------|-------------------------------------------------------------------------------------------------------------------------------|
| Ac                | <i>trans</i> | –              | –          | –          | –          | 2.01                                                                                                                          |
| L1                | <i>trans</i> | 8.39           | 4.61       | 1.49       | 1.60       | H $\delta$ : 0.90                                                                                                             |
| L2                | <i>trans</i> | 8.19           | 4.51       | 0.92, 1.43 | 1.16       | H $\delta$ : 0.31, 0.51                                                                                                       |
| V3                | <i>trans</i> | 8.90           | 4.46       | 2.09       | 0.90       | –                                                                                                                             |
| <sup>D</sup> P4   | <i>trans</i> | –              | 4.36       | 2.17       | 1.95       | H $\delta$ : 3.72                                                                                                             |
| G5                | <i>trans</i> | 8.11           | 3.50, 3.81 | –          | –          | –                                                                                                                             |
| Y6                | <i>trans</i> | 7.97           | 4.69       | 2.90, 3.17 | –          | H $\delta$ : 7.11; H $\epsilon$ : 6.68                                                                                        |
| W7                | <i>trans</i> | 8.47           | 5.05       | 3.02, 3.12 | –          | H $\delta$ 1: 7.07, H $\epsilon$ 1: 10.15,<br>H $\epsilon$ 3: 7.39, H $\zeta$ 3: 7.03,<br>H $\eta$ 2: 6.96, H $\zeta$ 2: 7.27 |
| V8                | <i>trans</i> | 8.87           | 4.30       | 2.09       | 0.94       | –                                                                                                                             |
| CONH <sub>2</sub> | <i>trans</i> | 6.93, 7.53     | –          | –          | –          | –                                                                                                                             |

**Table S3:** Resonance assignment of 8W-P in CD<sub>3</sub>OH at 298 K

| Residue           | X-P amide    | H <sup>N</sup> | H $\alpha$ | H $\beta$  | H $\gamma$ | Others                                                                                                                        |
|-------------------|--------------|----------------|------------|------------|------------|-------------------------------------------------------------------------------------------------------------------------------|
| Ac                | <i>trans</i> | –              | –          | –          | –          | 2.03                                                                                                                          |
| L1                | <i>trans</i> | 8.64           | 4.93       | 1.56       | 1.68       | H $\delta$ : 0.94                                                                                                             |
| P2                | <i>trans</i> | –              | 4.41       | 1.33, 1.65 | 1.75, 2.10 | H $\delta$ : 3.62, 3.82                                                                                                       |
| V3                | <i>trans</i> | 8.71           | 4.37       | 2.04       | 0.90       | –                                                                                                                             |
| <sup>D</sup> P4   | <i>trans</i> | –              | 4.34       | 2.18       | 1.90       | H $\delta$ : 3.60, 3.66                                                                                                       |
| G5                | <i>trans</i> | 8.43           | 3.59, 3.75 | –          | –          | –                                                                                                                             |
| Y6                | <i>trans</i> | 7.86           | 4.69       | 2.92, 2.97 | –          | H $\delta$ : 7.10; H $\epsilon$ : 6.67                                                                                        |
| W7                | <i>trans</i> | 8.44           | 4.94       | 2.97, 3.02 | –          | H $\delta$ 1: 7.03, H $\epsilon$ 1: 10.20,<br>H $\epsilon$ 3: 7.33, H $\zeta$ 3: 7.04,<br>H $\eta$ 2: 6.97, H $\zeta$ 2: 7.27 |
| V8                | <i>trans</i> | 8.61           | 4.33       | 2.10       | 0.96       | –                                                                                                                             |
| CONH <sub>2</sub> | <i>trans</i> | 7.06, 7.67     | –          | –          | –          | –                                                                                                                             |

**Table S4:** Resonance assignment of 8W-G in CD<sub>3</sub>OH at 298 K

| Residue           | X-P amide    | H <sup>N</sup> | H $\alpha$ | H $\beta$  | H $\gamma$ | Others                                                                                                                        |
|-------------------|--------------|----------------|------------|------------|------------|-------------------------------------------------------------------------------------------------------------------------------|
| Ac                | <i>trans</i> | –              | –          | –          | –          | 1.94                                                                                                                          |
| L1                | <i>trans</i> | 8.22           | 4.43       | 1.56       | 1.56       | H $\delta$ : 0.91                                                                                                             |
| G2                | <i>trans</i> | 8.23           | 3.60, 3.95 | –          | –          | –                                                                                                                             |
| V3                | <i>trans</i> | 8.35           | 4.45       | 2.11       | 0.94       | –                                                                                                                             |
| <sup>D</sup> P4   | <i>trans</i> | –              | 4.36       | 2.23       | 2.00       | H $\delta$ : 3.70, 3.86                                                                                                       |
| G5                | <i>trans</i> | 8.27           | 3.69, 3.77 | –          | –          | –                                                                                                                             |
| Y6                | <i>trans</i> | 7.85           | 4.55       | 2.93       | –          | H $\delta$ : 7.08; H $\epsilon$ : 6.65                                                                                        |
| W7                | <i>trans</i> | 8.27           | 4.84       | 3.06, 3.22 | –          | H $\delta$ 1: 7.08, H $\epsilon$ 1: 10.18,<br>H $\epsilon$ 3: 7.50, H $\zeta$ 3: 7.05,<br>H $\eta$ 2: 6.97, H $\zeta$ 2: 7.28 |
| V8                | <i>trans</i> | 8.07           | 4.21       | 2.05       | 0.88       | –                                                                                                                             |
| CONH <sub>2</sub> | <i>trans</i> | 6.91, 7.31     | –          | –          | –          | –                                                                                                                             |

**Table S5:** Resonance assignment of 8W-PG in CD<sub>3</sub>OH at 298 K

| Residue           | X-P amide    | H <sup>N</sup> | H $\alpha$ | H $\beta$  | H $\gamma$ | Others                                                                                                                        |
|-------------------|--------------|----------------|------------|------------|------------|-------------------------------------------------------------------------------------------------------------------------------|
| Ac                | <i>trans</i> | –              | –          | –          | –          | 1.91                                                                                                                          |
| L1                | <i>trans</i> | 8.31           | 4.76       | 1.53, 1.57 | 1.69       | H $\delta$ : 0.95                                                                                                             |
| P2a               | <i>trans</i> | –              | 4.16       | 2.04       | 1.90       | H $\delta$ : 3.61, 3.84                                                                                                       |
| G2b               | <i>trans</i> | 8.19           | 3.82, 3.91 | –          | –          | –                                                                                                                             |
| V3                | <i>trans</i> | 8.24           | 4.42       | 2.17       | 0.99       | –                                                                                                                             |
| <sup>D</sup> P4   | <i>trans</i> | –              | 4.41       | 2.23       | 2.02       | H $\delta$ : 3.71, 3.96                                                                                                       |
| G5                | <i>trans</i> | 8.06           | 3.68, 3.85 | –          | –          | –                                                                                                                             |
| Y6                | <i>trans</i> | 7.86           | 4.55       | 2.90, 2.96 | –          | H $\delta$ : 7.05; H $\epsilon$ : 6.65                                                                                        |
| W7                | <i>trans</i> | 8.29           | 4.71       | 3.11, 3.23 | –          | H $\delta$ 1: 7.13, H $\epsilon$ 1: 10.19,<br>H $\epsilon$ 3: 7.53, H $\zeta$ 3: 7.05,<br>H $\eta$ 2: 6.98, H $\zeta$ 2: 7.30 |
| V8                | <i>trans</i> | 8.01           | 4.19       | 2.03       | 0.90       | –                                                                                                                             |
| CONH <sub>2</sub> | <i>trans</i> | 6.95, 7.34     | –          | –          | –          | –                                                                                                                             |

\*\* For two-residue substitution at position 2, the 1<sup>st</sup> amino acid was denoted by position 2a and the 2<sup>nd</sup> amino acid was denoted by position 2b to maintain parity with one-residue substitution

**Table S6:** Resonance assignment of 8W-GP in CD<sub>3</sub>OH at 298 K

| Residue           | X-P amide    | H <sup>N</sup> | H $\alpha$ | H $\beta$  | H $\gamma$ | Others                                                                                                                        |
|-------------------|--------------|----------------|------------|------------|------------|-------------------------------------------------------------------------------------------------------------------------------|
| Ac                | <i>cis</i>   | –              | –          | –          | –          | 2.00                                                                                                                          |
|                   | <i>trans</i> | –              | –          | –          | –          | 1.98                                                                                                                          |
| L1                | <i>cis</i>   | 8.44           | 4.57       | 1.64       | 1.68       | H $\delta$ : 0.93                                                                                                             |
|                   | <i>trans</i> | 8.17           | 4.50       | 1.59       | 1.66       | H $\delta$ : 0.91                                                                                                             |
| G2a               | <i>cis</i>   | 8.10           | 3.47, 4.21 | –          | –          | –                                                                                                                             |
|                   | <i>trans</i> | 8.01           | 3.48, 3.65 | –          | –          | –                                                                                                                             |
| P2b               | <i>cis</i>   | –              | 4.48       | 1.85       | 1.46, 1.65 | H $\delta$ : 3.28, 3.44                                                                                                       |
|                   | <i>trans</i> | –              | 4.44       | 1.90       | 1.71, 1.82 | H $\delta$ : 3.02, 3.31                                                                                                       |
| V3                | <i>cis</i>   | 8.76           | 4.50       | 2.14       | 0.97       | –                                                                                                                             |
|                   | <i>trans</i> | 8.49           | 4.43       | 2.10       | 0.93       | –                                                                                                                             |
| <sup>D</sup> P4   | <i>cis</i>   | –              | 4.36       | 2.22       | 1.95, 2.07 | H $\delta$ : 3.72                                                                                                             |
|                   | <i>trans</i> | –              | 4.36       | 2.22       | 1.95, 2.07 | H $\delta$ : 3.72                                                                                                             |
| G5                | <i>cis</i>   | 8.3            | 3.54, 3.85 | –          | –          | –                                                                                                                             |
|                   | <i>trans</i> | 8.05           | 3.68, 3.78 | –          | –          | –                                                                                                                             |
| Y6                | <i>cis</i>   | 8.07           | 4.68       | 2.97, 3.01 | –          | H $\delta$ : 6.96; H $\epsilon$ : 6.64                                                                                        |
|                   | <i>trans</i> | 7.96           | 4.66       | 2.95, 3.01 | –          | H $\delta$ : 7.11; H $\epsilon$ : 6.68                                                                                        |
| W7                | <i>cis</i>   | 8.42           | 4.73       | 3.08, 3.23 | –          | H $\delta$ 1: 7.11, H $\epsilon$ 1: 10.22,<br>H $\epsilon$ 3: 7.50, H $\zeta$ 3: 7.05,<br>H $\eta$ 2: 6.93, H $\zeta$ 2: 7.28 |
|                   | <i>trans</i> | 8.50           | 4.67       | 3.05, 3.25 | –          | H $\delta$ 1: 7.11, H $\epsilon$ 1: 10.23,<br>H $\epsilon$ 3: 7.51, H $\zeta$ 3: 7.08,<br>H $\eta$ 2: 7.00, H $\zeta$ 2: 7.30 |
| V8                | <i>cis</i>   | 8.06           | 4.25       | 2.05       | 0.93       | –                                                                                                                             |
|                   | <i>trans</i> | 7.93           | 4.24       | 2.07       | 0.92       | –                                                                                                                             |
| CONH <sub>2</sub> | <i>cis</i>   | n.d., 7.51     | –          | –          | –          | –                                                                                                                             |
|                   | <i>trans</i> | 6.99, 7.52     | –          | –          | –          | –                                                                                                                             |

\* n.d. – not identified

**Table S7:** Resonance assignment of 8W-<sup>t</sup>P in CD<sub>3</sub>OH at 298 K

| Residue           | X-P amide    | H <sup>N</sup> | H $\alpha$ | H $\beta$  | H $\gamma$ | Others                                                                                                                        |
|-------------------|--------------|----------------|------------|------------|------------|-------------------------------------------------------------------------------------------------------------------------------|
| Ac                | <i>trans</i> | –              | –          | –          | –          | 1.92                                                                                                                          |
| L1                | <i>trans</i> | 8.50           | 4.79       | 1.66       | 1.55       | H $\delta$ : 0.92                                                                                                             |
| <sup>t</sup> P2   | <i>trans</i> | –              | 4.76       | 2.07, 2.19 | 5.36       | H $\delta$ : 3.87, 4.26                                                                                                       |
| V3                | <i>trans</i> | 8.76           | 4.42       | 2.07       | 0.94       | –                                                                                                                             |
| <sup>D</sup> P4   | <i>trans</i> | –              | 4.35       | 2.2        | 1.95, 2.07 | H $\delta$ : 3.68                                                                                                             |
| G5                | <i>trans</i> | 8.42           | 3.62, 3.77 | –          | –          | –                                                                                                                             |
| Y6                | <i>trans</i> | 7.91           | 4.65       | 2.90, 2.96 | –          | H $\delta$ : 7.08; H $\epsilon$ : 6.66                                                                                        |
| W7                | <i>trans</i> | 8.32           | 4.94       | 3.05, 3.10 | –          | H $\delta$ 1: 7.01, H $\epsilon$ 1: 10.12,<br>H $\epsilon$ 3: 7.43, H $\zeta$ 3: 7.03,<br>H $\eta$ 2: 6.98, H $\zeta$ 2: 7.27 |
| V8                | <i>trans</i> | 8.22           | 4.28       | 2.07       | 0.93       | –                                                                                                                             |
| CONH <sub>2</sub> | <i>trans</i> | 7.00, 7.52     | –          | –          | –          | –                                                                                                                             |

**Table S8:** Resonance assignment of 8W-<sup>c</sup>P in CD<sub>3</sub>OH at 298 K

| Residue           | X-P amide    | H <sup>N</sup> | H $\alpha$ | H $\beta$  | H $\gamma$ | Others                                                                                                                        |
|-------------------|--------------|----------------|------------|------------|------------|-------------------------------------------------------------------------------------------------------------------------------|
| Ac                | <i>trans</i> | –              | –          | –          | –          | 2.03                                                                                                                          |
| L1                | <i>trans</i> | 8.52           | 4.76       | 1.68       | 1.57       | H $\delta$ : 0.94                                                                                                             |
| <sup>c</sup> P2   | <i>trans</i> | –              | 4.59       | 1.51, 2.02 | 4.98       | H $\delta$ : 3.76, 4.10                                                                                                       |
| V3                | <i>trans</i> | 8.55           | 4.37       | 2.06       | 0.93       | –                                                                                                                             |
| <sup>D</sup> P4   | <i>trans</i> | –              | 4.34       | 2.16       | 1.94, 2.04 | H $\delta$ : 3.66                                                                                                             |
| G5                | <i>trans</i> | 8.26           | 3.60, 3.81 | –          | –          | –                                                                                                                             |
| Y6                | <i>trans</i> | 7.87           | 4.66       | 2.93, 2.97 | –          | H $\delta$ : 7.09; H $\epsilon$ : 6.67                                                                                        |
| W7                | <i>trans</i> | 8.38           | 4.77       | 3.03, 3.10 | –          | H $\delta$ 1: 7.08, H $\epsilon$ 1: 10.25,<br>H $\epsilon$ 3: 7.40, H $\zeta$ 3: 7.07,<br>H $\eta$ 2: 6.97, H $\zeta$ 2: 7.31 |
| V8                | <i>trans</i> | 8.2            | 4.27       | 2.08       | 0.92       | –                                                                                                                             |
| CONH <sub>2</sub> | <i>trans</i> | 7.03, 7.53     | –          | –          | –          | –                                                                                                                             |

**Table S9:** Resonance assignment of 8W-G<sup>1</sup>P in CD<sub>3</sub>OH at 298 K

| Residue           | X-P amide    | H <sup>N</sup> | H $\alpha$ | H $\beta$  | H $\gamma$ | Others                                                                                                                        |
|-------------------|--------------|----------------|------------|------------|------------|-------------------------------------------------------------------------------------------------------------------------------|
| Ac                | <i>cis</i>   | –              | –          | –          | –          | 1.99                                                                                                                          |
|                   | <i>trans</i> | –              | –          | –          | –          | 1.97                                                                                                                          |
| L1                | <i>cis</i>   | 8.30           | 4.49       | 1.65       | 1.60       | H $\delta$ : 0.92                                                                                                             |
|                   | <i>trans</i> | 8.13           | 4.46       | 1.56       | 1.64       | H $\delta$ : 0.90                                                                                                             |
| G2a               | <i>cis</i>   | 8.01           | 3.69, 4.17 | –          | –          | –                                                                                                                             |
|                   | <i>trans</i> | 8.03           | 3.71       | –          | –          | –                                                                                                                             |
| <sup>t</sup> P2b  | <i>cis</i>   | –              | 4.81       | 2.16, 2.54 | 5.12       | H $\delta$ : 3.53, 4.00                                                                                                       |
|                   | <i>trans</i> | –              | 4.70       | 2.03, 2.38 | 5.23       | H $\delta$ : 3.66                                                                                                             |
| V3                | <i>cis</i>   | 8.81           | 4.54       | 2.17       | 1.02       | –                                                                                                                             |
|                   | <i>trans</i> | 8.62           | 4.40       | 2.13       | 0.97       | –                                                                                                                             |
| <sup>D</sup> P4   | <i>cis</i>   | –              | 4.38       | 2.16       | 1.94       | H $\delta$ : 3.73, 3.81                                                                                                       |
|                   | <i>trans</i> | –              | 4.38       | 2.22       | 1.97, 2.08 | H $\delta$ : 3.69, 3.78                                                                                                       |
| G5                | <i>cis</i>   | 8.32           | 3.56, 3.90 | –          | –          | –                                                                                                                             |
|                   | <i>trans</i> | 8.19           | 3.65, 3.83 | –          | –          | –                                                                                                                             |
| Y6                | <i>cis</i>   | 8.09           | 4.63       | 2.96       | –          | H $\delta$ : 7.07; H $\epsilon$ : 6.66                                                                                        |
|                   | <i>trans</i> | 8.01           | 4.62       | 2.93, 2.98 | –          | H $\delta$ : 7.09; H $\epsilon$ : 6.67                                                                                        |
| W7                | <i>cis</i>   | 8.27           | 4.70       | 3.14, 3.25 | –          | H $\delta$ 1: 7.10, H $\epsilon$ 1: 10.21,<br>H $\epsilon$ 3: 7.53, H $\zeta$ 3: 7.05,<br>H $\eta$ 2: 6.97, H $\zeta$ 2: 7.29 |
|                   | <i>trans</i> | 8.36           | 4.68       | 3.08, 3.24 | –          | H $\delta$ 1: 7.09, H $\epsilon$ 1: 10.22,<br>H $\epsilon$ 3: 7.54, H $\zeta$ 3: 7.08,<br>H $\eta$ 2: 7.02, H $\zeta$ 2: 7.31 |
| V8                | <i>cis</i>   | 7.78           | 4.20       | 2.00       | 0.89       | –                                                                                                                             |
|                   | <i>trans</i> | 7.72           | 4.18       | 2.02       | 0.89       | –                                                                                                                             |
| CONH <sub>2</sub> | <i>cis</i>   | 6.92, 7.37     | –          | –          | –          | –                                                                                                                             |
|                   | <i>trans</i> | 6.86, 7.33     | –          | –          | –          | –                                                                                                                             |

**Table S10:** Resonance assignment of 8W-G<sup>c</sup>P in CD<sub>3</sub>OH at 298 K

| Residue           | X-P amide    | H <sup>N</sup> | H $\alpha$ | H $\beta$  | H $\gamma$ | Others                                                                                                                        |
|-------------------|--------------|----------------|------------|------------|------------|-------------------------------------------------------------------------------------------------------------------------------|
| Ac                | <i>cis</i>   | –              | –          | –          | –          | 1.98                                                                                                                          |
|                   | <i>trans</i> | –              | –          | –          | –          | 2.01                                                                                                                          |
| L1                | <i>cis</i>   | 8.46           | 4.59       | 1.64       | 1.69       | H $\delta$ : 0.94                                                                                                             |
|                   | <i>trans</i> | 8.21           | 4.40       | 1.60       | 1.68       | H $\delta$ : 0.93                                                                                                             |
| G2a               | <i>cis</i>   | 8.20           | 3.51, 4.21 | –          | –          | –                                                                                                                             |
|                   | <i>trans</i> | 7.77           | 2.76, 3.31 | –          | –          | –                                                                                                                             |
| <sup>c</sup> P2b  | <i>cis</i>   | –              | 4.64       | 1.53, 2.24 | 4.77       | H $\delta$ : 3.47, 3.65                                                                                                       |
|                   | <i>trans</i> | –              | 4.49       | 2.02, 2.31 | 5.03       | H $\delta$ : 2.98, 3.21                                                                                                       |
| V3                | <i>cis</i>   | 8.66           | 4.45       | 2.15       | 0.96       | –                                                                                                                             |
|                   | <i>trans</i> | 8.27           | 4.47       | 2.07       | 0.88       | –                                                                                                                             |
| <sup>D</sup> P4   | <i>cis</i>   | –              | 4.36       | 2.05       | 1.92, 2.16 | H $\delta$ : 3.63, 3.70                                                                                                       |
|                   | <i>trans</i> | –              | 4.36       | 2.03       | 1.94, 2.26 | H $\delta$ : 3.70, 3.74                                                                                                       |
| G5                | <i>cis</i>   | 8.17           | 3.55, 3.82 | –          | –          | –                                                                                                                             |
|                   | <i>trans</i> | 7.40           | 3.67, 3.90 | –          | –          | –                                                                                                                             |
| Y6                | <i>cis</i>   | 7.99           | 4.69       | 3.00       | –          | H $\delta$ : 7.12; H $\epsilon$ : 6.68                                                                                        |
|                   | <i>trans</i> | 7.86           | 4.63       | 3.00, 3.06 | –          | H $\delta$ : 7.14; H $\epsilon$ : 6.69                                                                                        |
| W7                | <i>cis</i>   | 8.55           | 4.68       | 3.07, 3.25 | –          | H $\delta$ 1: 7.14, H $\epsilon$ 1: 10.25,<br>H $\epsilon$ 3: 7.52, H $\zeta$ 3: 7.05,<br>H $\eta$ 2: 6.92, H $\zeta$ 2: 7.29 |
|                   | <i>trans</i> | 8.59           | 4.63       | 3.04, 3.36 | –          | H $\delta$ 1: 7.19, H $\epsilon$ 1: 10.21,<br>H $\epsilon$ 3: 7.68, H $\zeta$ 3: 7.09,<br>H $\eta$ 2: 7.05, H $\zeta$ 2: 7.28 |
| V8                | <i>cis</i>   | 8.00           | 4.28       | 2.05       | 0.92       | –                                                                                                                             |
|                   | <i>trans</i> | 7.64           | 4.27       | 2.07       | 0.94       | –                                                                                                                             |
| CONH <sub>2</sub> | <i>cis</i>   | n.d.           | –          | –          | –          | –                                                                                                                             |
|                   | <i>trans</i> | 7.03, 7.56     | –          | –          | –          | –                                                                                                                             |

\* n.d. – not identified

**Table S11:** Resonance assignment of 8V-L in CD<sub>3</sub>OH at 298 K

| Residue           | X-P amide    | H <sup>N</sup> | H $\alpha$ | H $\beta$  | H $\gamma$ | Others                                 |
|-------------------|--------------|----------------|------------|------------|------------|----------------------------------------|
| Ac                | <i>trans</i> | –              | –          | –          | –          | 1.93                                   |
| L1                | <i>trans</i> | 8.42           | 4.56       | 1.53       | 1.62       | H $\delta$ : 0.92                      |
| L2                | <i>trans</i> | 8.39           | 4.88       | 1.53       | 1.67       | H $\delta$ : 0.85                      |
| V3                | <i>trans</i> | 8.97           | 4.49       | 2.11       | 0.91, 0.95 | –                                      |
| <sup>D</sup> P4   | <i>trans</i> | –              | 4.39       | 2.19       | 1.98       | H $\delta$ : 3.72                      |
| G5                | <i>trans</i> | 8.36           | 3.45, 3.97 | –          | –          | –                                      |
| Y6                | <i>trans</i> | 8.12           | 4.73       | 2.90, 2.97 | –          | H $\delta$ : 7.14; H $\epsilon$ : 6.69 |
| V7                | <i>trans</i> | 8.39           | 4.61       | 1.94       | 0.85, 0.89 | –                                      |
| V8                | <i>trans</i> | 8.88           | 4.32       | 2.08       | 0.94, 0.96 | –                                      |
| CONH <sub>2</sub> | <i>trans</i> | 7.07, 7.77     | –          | –          | –          | –                                      |

**Table S12:** Resonance assignment of 8V-P in CD<sub>3</sub>OH at 298 K

| Residue           | X-P amide    | H <sup>N</sup> | H $\alpha$ | H $\beta$  | H $\gamma$ | Others                                 |
|-------------------|--------------|----------------|------------|------------|------------|----------------------------------------|
| Ac                | <i>trans</i> | –              | –          | –          | –          | 1.91                                   |
| L1                | <i>trans</i> | 8.54           | 4.84       | 1.58       | 1.66       | H $\delta$ : 0.91, 0.94                |
| P2                | <i>trans</i> | –              | 4.04       | 2.15, 2.27 | 1.98       | H $\delta$ : 3.71                      |
| V3                | <i>trans</i> | 8.86           | 4.44       | 2.09       | 0.94       | –                                      |
| <sup>D</sup> P4   | <i>trans</i> | –              | 4.39       | 2.15, 2.21 | 1.98       | H $\delta$ : 3.66, 3.73                |
| G5                | <i>trans</i> | 8.59           | 3.53, 3.92 | –          | –          | –                                      |
| Y6                | <i>trans</i> | 8.01           | 4.73       | 2.96       | –          | H $\delta$ : 7.13; H $\epsilon$ : 6.68 |
| V7                | <i>trans</i> | 8.32           | 4.47       | 1.91       | 0.80, 0.85 | –                                      |
| V8                | <i>trans</i> | 8.50           | 4.32       | 2.11       | 0.97       | –                                      |
| CONH <sub>2</sub> | <i>trans</i> | 7.11, 7.77     | –          | –          | –          | –                                      |

**Table S13:** Resonance assignment of 8V-G in CD<sub>3</sub>OH at 298 K

| Residue           | X-P amide    | H <sup>N</sup> | H $\alpha$ | H $\beta$ | H $\gamma$ | Others                                 |
|-------------------|--------------|----------------|------------|-----------|------------|----------------------------------------|
| Ac                | <i>trans</i> | –              | –          | –         | –          | 1.96                                   |
| L1                | <i>trans</i> | 8.29           | 4.49       | 1.57      | 1.65       | H $\delta$ : 0.93                      |
| G2                | <i>trans</i> | 8.42           | 3.87, 4.23 | –         | –          | –                                      |
| V3                | <i>trans</i> | 8.49           | 4.51       | 2.13      | 0.98       | –                                      |
| <sup>D</sup> P4   | <i>trans</i> | –              | 4.37       | 2.24      | 1.98, 2.08 | H $\delta$ : 3.73, 3.84                |
| G5                | <i>trans</i> | 8.38           | 3.76       | –         | –          | –                                      |
| Y6                | <i>trans</i> | 7.96           | 4.62       | 2.99      | –          | H $\delta$ : 7.12; H $\epsilon$ : 6.67 |
| V7                | <i>trans</i> | 8.19           | 4.37       | 1.99      | 0.90       | –                                      |
| V8                | <i>trans</i> | 8.25           | 4.24       | 2.07      | 0.96       | –                                      |
| CONH <sub>2</sub> | <i>trans</i> | 7.04, 7.65     | –          | –         | –          | –                                      |



**Table S14:** Resonance assignment of 8V-PG in CD<sub>3</sub>OH at 298 K

| Residue           | X-P amide    | H <sup>N</sup> | H $\alpha$ | H $\beta$  | H $\gamma$ | Others                                 |
|-------------------|--------------|----------------|------------|------------|------------|----------------------------------------|
| Ac                | <i>trans</i> | –              | –          | –          | –          | 1.90                                   |
| L1                | <i>trans</i> | 8.27           | 4.75       | 1.55       | 1.69       | H $\delta$ : 0.95                      |
| P2a               | <i>trans</i> | –              | 4.32       | 2.16       | 1.98       | H $\delta$ : 3.64, 3.91                |
| G2b               | <i>trans</i> | 8.36           | 3.93, 4.07 | –          | –          | –                                      |
| V3                | <i>trans</i> | 8.31           | 4.46       | 2.16       | 0.99       | –                                      |
| <sup>D</sup> P4   | <i>trans</i> | –              | 4.38       | 2.23       | 2.02       | H $\delta$ : 3.72, 3.96                |
| G5                | <i>trans</i> | 8.12           | 3.70, 3.86 | –          | –          | –                                      |
| Y6                | <i>trans</i> | 7.89           | 4.57       | 2.96, 3.01 | –          | H $\delta$ : 7.09; H $\epsilon$ : 6.66 |
| V7                | <i>trans</i> | 8.20           | 4.24       | 2.03       | 0.92       | –                                      |
| V8                | <i>trans</i> | 8.09           | 4.22       | 2.05       | 0.96       | –                                      |
| CONH <sub>2</sub> | <i>trans</i> | 7.02, 7.60     | –          | –          | –          | –                                      |

**Table S15:** Resonance assignment of 8V-GP in CD<sub>3</sub>OH at 298 K

| Residue           | X-P amide    | H <sup>N</sup> | H $\alpha$ | H $\beta$  | H $\gamma$ | Others                                 |
|-------------------|--------------|----------------|------------|------------|------------|----------------------------------------|
| Ac                | <i>cis</i>   | –              | –          | –          | –          | 2.00                                   |
|                   | <i>trans</i> | –              | –          | –          | –          | 1.99                                   |
| L1                | <i>cis</i>   | 8.32           | 4.48       | 1.61       | 1.65       | H $\delta$ : 0.94                      |
|                   | <i>trans</i> | 8.19           | 4.50       | 1.58       | 1.66       | H $\delta$ : 0.92                      |
| G2a               | <i>cis</i>   | 8.06           | 3.61, 4.26 | –          | –          | –                                      |
|                   | <i>trans</i> | 8.10           | 4.00, 4.12 | –          | –          | –                                      |
| P2b               | <i>cis</i>   | –              | 4.74       | 2.26       | 1.88, 2.16 | H $\delta$ : 3.58, 3.63                |
|                   | <i>trans</i> | –              | 4.65       | 2.16       | 1.99, 2.08 | H $\delta$ : 3.60, 3.66                |
| V3                | <i>cis</i>   | 8.70           | 4.55       | 2.16       | 1.00       | –                                      |
|                   | <i>trans</i> | 8.45           | 4.44       | 2.13       | 0.99       | –                                      |
| <sup>D</sup> P4   | <i>cis</i>   | –              | 4.38       | 2.21       | 1.98, 2.10 | H $\delta$ : 3.75, 3.79                |
|                   | <i>trans</i> | –              | 4.38       | 2.21       | 1.98, 2.09 | H $\delta$ : 3.70, 3.79                |
| G5                | <i>cis</i>   | 8.39           | 3.60, 3.92 | –          | –          | –                                      |
|                   | <i>trans</i> | 8.32           | 3.66, 3.91 | –          | –          | –                                      |
| Y6                | <i>cis</i>   | 8.12           | 4.69       | 3.04       | –          | H $\delta$ : 7.13; H $\epsilon$ : 6.69 |
|                   | <i>trans</i> | 8.02           | 4.65       | 2.99, 3.04 | –          | H $\delta$ : 7.12; H $\epsilon$ : 6.70 |
| V7                | <i>cis</i>   | 8.25           | 4.16       | 2.05       | 0.95       | –                                      |
|                   | <i>trans</i> | 8.17           | 4.19       | 2.05       | 0.93       | –                                      |
| V8                | <i>cis</i>   | 7.90           | 4.26       | 2.04       | 0.95       | –                                      |
|                   | <i>trans</i> | 7.96           | 4.20       | 2.07       | 0.96       | –                                      |
| CONH <sub>2</sub> | <i>cis</i>   | 7.01, 7.68     | –          | –          | –          | –                                      |
|                   | <i>trans</i> | 7.01, 7.64     | –          | –          | –          | –                                      |

**Table S16:** Resonance assignment of  $\delta V\_G^tP$  in  $CD_3OH$  at 298 K

| <b>Residue</b>    | <b>X-P amide</b> | <b>H<sup>N</sup></b> | <b>H<math>\alpha</math></b> | <b>H<math>\beta</math></b> | <b>H<math>\gamma</math></b> | <b>Others</b>                          |
|-------------------|------------------|----------------------|-----------------------------|----------------------------|-----------------------------|----------------------------------------|
| Ac                | <i>cis</i>       | –                    | –                           | –                          | –                           | 1.99                                   |
|                   | <i>trans</i>     | –                    | –                           | –                          | –                           | 1.97                                   |
| L1                | <i>cis</i>       | 8.33                 | 4.50                        | 1.60                       | 1.65                        | H $\delta$ : 0.93                      |
|                   | <i>trans</i>     | 8.16                 | 4.51                        | 1.57                       | 1.65                        | H $\delta$ : 0.92                      |
| G2a               | <i>cis</i>       | 8.07                 | 3.66, 4.31                  | –                          | –                           | –                                      |
|                   | <i>trans</i>     | 8.22                 | 4.05, 4.10                  | –                          | –                           | –                                      |
| <sup>t</sup> P2b  | <i>cis</i>       | –                    | 4.96                        | 2.25, 2.69                 | 5.24                        | H $\delta$ : 3.57, 4.12                |
|                   | <i>trans</i>     | –                    | 4.86                        | 2.14, 2.56                 | 5.35                        | H $\delta$ : 3.82, 3.96                |
| V3                | <i>cis</i>       | 8.91                 | 4.57                        | 2.17                       | 1.02                        | –                                      |
|                   | <i>trans</i>     | 8.72                 | 4.43                        | 2.14                       | 0.98, 1.02                  | –                                      |
| <sup>D</sup> P4   | <i>cis</i>       | –                    | 4.37                        | 2.20                       | 1.97, 2.10                  | H $\delta$ : 3.75, 3.77                |
|                   | <i>trans</i>     | –                    | 4.37                        | 2.21                       | 1.97, 2.10                  | H $\delta$ : 3.71, 3.76                |
| G5                | <i>cis</i>       | 8.41                 | 3.53, 3.94                  | –                          | –                           | –                                      |
|                   | <i>trans</i>     | 8.38                 | 3.59, 3.90                  | –                          | –                           | –                                      |
| Y6                | <i>cis</i>       | 8.15                 | 4.70                        | 3.04                       | –                           | H $\delta$ : 7.14; H $\epsilon$ : 6.69 |
|                   | <i>trans</i>     | 8.06                 | 4.66                        | 2.99                       | –                           | H $\delta$ : 7.12; H $\epsilon$ : 6.68 |
| V7                | <i>cis</i>       | 8.33                 | 4.18                        | 2.03                       | 0.94                        | –                                      |
|                   | <i>trans</i>     | 8.22                 | 4.19                        | 2.00                       | 0.89                        | –                                      |
| V8                | <i>cis</i>       | 7.81                 | 4.26                        | 2.03                       | 0.93, 0.95                  | –                                      |
|                   | <i>trans</i>     | 7.81                 | 4.20                        | 2.08                       | 0.97                        | –                                      |
| CONH <sub>2</sub> | <i>cis</i>       | 7.02, 7.66           | –                           | –                          | –                           | –                                      |
|                   | <i>trans</i>     | 7.03, 7.66           | –                           | –                          | –                           | –                                      |

**Table S17:** Resonance assignment of 8V\_G<sup>c</sup>P in CD<sub>3</sub>OH at 298 K

| <b>Residue</b>    | <b>X-P amide</b> | <b>H<sup>N</sup></b> | <b>H<math>\alpha</math></b> | <b>H<math>\beta</math></b> | <b>H<math>\gamma</math></b> | <b>Others</b>                          |
|-------------------|------------------|----------------------|-----------------------------|----------------------------|-----------------------------|----------------------------------------|
| Ac                | <i>cis</i>       | –                    | –                           | –                          | –                           | 1.99                                   |
|                   | <i>trans</i>     | –                    | –                           | –                          | –                           | 1.97                                   |
| L1                | <i>cis</i>       | 8.31                 | 4.47                        | 1.61                       | 1.66                        | H $\delta$ : 0.92                      |
|                   | <i>trans</i>     | 8.20                 | 4.48                        | 1.57, 1.62                 | 1.67                        | H $\delta$ : 0.90, 0.93                |
| G2a               | <i>cis</i>       | 8.03                 | 3.67, 4.27                  | –                          | –                           | –                                      |
|                   | <i>trans</i>     | 8.11                 | 3.91, 4.09                  | –                          | –                           | –                                      |
| <sup>c</sup> P2b  | <i>cis</i>       | –                    | 4.86                        | 2.54, 2.69                 | 5.24                        | H $\delta$ : 3.81, 3.86                |
|                   | <i>trans</i>     | –                    | 4.73                        | 2.45                       | 5.34                        | H $\delta$ : 3.90, 3.97                |
| V3                | <i>cis</i>       | 8.53                 | 4.48                        | 2.19                       | 0.98                        | –                                      |
|                   | <i>trans</i>     | 8.20                 | 4.43                        | 2.13                       | 0.96                        | –                                      |
| <sup>D</sup> P4   | <i>cis</i>       | –                    | 4.37                        | 2.16                       | 1.95, 2.09                  | H $\delta$ : 3.67, 3.75                |
|                   | <i>trans</i>     | –                    | 4.37                        | 2.18                       | 1.96, 2.04                  | H $\delta$ : 3.65, 3.81                |
| G5                | <i>cis</i>       | 8.39                 | 3.55, 3.92                  | –                          | –                           | –                                      |
|                   | <i>trans</i>     | 8.05                 | 3.74, 3.87                  | –                          | –                           | –                                      |
| Y6                | <i>cis</i>       | 8.10                 | 4.68                        | 3.05                       | –                           | H $\delta$ : 7.16; H $\epsilon$ : 6.69 |
|                   | <i>trans</i>     | 7.94                 | 4.63                        | 2.99, 3.04                 | –                           | H $\delta$ : 7.12; H $\epsilon$ : 6.68 |
| V7                | <i>cis</i>       | 8.30                 | 4.05                        | 2.06                       | 0.98                        | –                                      |
|                   | <i>trans</i>     | 8.12                 | 4.17                        | 2.07                       | 0.95                        | –                                      |
| V8                | <i>cis</i>       | 7.70                 | 4.30                        | 2.02                       | 0.95                        | –                                      |
|                   | <i>trans</i>     | 7.83                 | 4.19                        | 2.06                       | 0.96                        | –                                      |
| CONH <sub>2</sub> | <i>cis</i>       | 7.01, 7.69           | –                           | –                          | –                           | –                                      |
|                   | <i>trans</i>     | 7.01, 7.60           | –                           | –                          | –                           | –                                      |
